# Supplementary material for: A model framework on atmosphere-snow water vapor exchange and the associated isotope effects at Dome Argus, Antarctica: part I the diurnal changes
Source: Copernicus journal article supplement (doi:10.5194/tc-2023-76), 2023-07-11
Supplement: Supplementary file 1 [file tc-2023-76-supplement.pdf]

1  
2 Supplement of  
3 **Diurnal simulations on atmosphere-snow water vapor exchange and the**  
4 **associated isotope effects at Dome Argus, Antarctica**  
5  
6

7 **Tianming Ma<sup>1,2</sup>, Zhuang Jiang<sup>1</sup>, Minghu Ding<sup>3,2</sup>, Yuansheng Li<sup>4</sup>, Wenqian**  
8 **Zhang<sup>3</sup> and Lei Geng<sup>1, 2, 5</sup>**

9 <sup>1</sup> School of Earth and Space Sciences, University of Science and Technology of  
10 China, Hefei 230026, China.

11 <sup>2</sup> State Key Laboratory of Cryospheric Science, Northwest Institute of Eco-  
12 Environment and Resources, Chinese Academy of Sciences, Lanzhou 730000, China.

13 <sup>3</sup> Chinese Academy of Meteorological Sciences, Beijing 100081, China.

14 <sup>4</sup> Polar Research Institute of China, Shanghai 200136, China.

15 <sup>5</sup> CAS Center for Excellence in Comparative Planetology, University of Science and  
16 Technology of China, Hefei 230026, Anhui, China.

17  
18 *Correspondence to:* Lei Geng (genglei@ustc.edu.cn)

19  
20  
21  
22  
23 **Contents of this file**

24 Texts S1 to S2

25 Table S1  
26  
27  
28  
29  
30  
31  
32  
33  
34  
35  
36  
37  
38

**Table S1.** List of variables in the model

| Variables              | Description (Unit)                                                                                                                                          |
|------------------------|-------------------------------------------------------------------------------------------------------------------------------------------------------------|
| $E_x$                  | Air-snow exchange flux ( $\text{kg}\cdot\text{m}^{-2}\cdot\text{s}^{-1}$ )                                                                                  |
| LE                     | Latent heat ( $\text{W}\cdot\text{m}^{-2}$ )                                                                                                                |
| $\rho_v$               | Dry air density ( $\text{kg}\cdot\text{m}^{-3}$ )                                                                                                           |
| $T_a$                  | Air temperature at 4m height (K)                                                                                                                            |
| $P_a$                  | Atmospheric pressure (hPa)                                                                                                                                  |
| $L_s$                  | Sublimation heat constant ( $\text{J}\cdot\text{kg}^{-1}$ ), $L_s = 2.86\times 10^6 \text{ J}\cdot\text{kg}^{-1}$                                           |
| $z$                    | Reference height in the boundary layer (m), $z = 4\text{m}$                                                                                                 |
| $r_a$                  | Aerodynamic resistance from a reference height in the boundary layer to snow surface ( $\text{s}\cdot\text{m}^{-1}$ )                                       |
| $q_s$                  | Saturated specific humidity over ice surface derived from the Clapeyron-Clausius equation ( $\text{kg}\cdot\text{kg}^{-1}$ )                                |
| RH <sub>i</sub>        | Calibrated relative humidity over ice surface (%)                                                                                                           |
| $q_a$                  | Specific humidity over ice surface ( $\text{kg}\cdot\text{kg}^{-1}$ )                                                                                       |
| $dq_a/dt \times dT/dt$ | Time derivatives of specific humidity and air temperature                                                                                                   |
| $C_E$                  | Transfer coefficient for humidity                                                                                                                           |
| $u_z$                  | Wind speed ( $\text{m}\cdot\text{s}^{-1}$ )                                                                                                                 |
| $k$                    | von-karman constant, $k=0.40$                                                                                                                               |
| $z_0$                  | Surface roughness length for humidity exchange (m), $z_0=2.44\times 10^{-4}\text{m}$ at Dome A                                                              |
| $\Psi_M$               | Diabatic corrections with respect to the ratio of the reference layer height                                                                                |
| $L$                    | Monin-Obukhov length (m)                                                                                                                                    |
| $\bar{\theta}$         | Mean potential temperature between the surface and a reference height in the boundary layer (K)                                                             |
| $\theta$               | potential temperature at the snow surface (K)                                                                                                               |
| $\theta_z$             | potential temperature at the reference height (K)                                                                                                           |
| $u^*$                  | Friction velocity ( $\text{m}\cdot\text{s}^{-1}$ )                                                                                                          |
| $\theta^*$             | Temperature turbulent scale (K)                                                                                                                             |
| $g$                    | Gravity acceleration ( $\text{m}\cdot\text{s}^{-2}$ ), $g=9.8 \text{ m/s}^2$                                                                                |
| Ri                     | Richardson number                                                                                                                                           |
| $M_s$                  | Snow mass (kg)                                                                                                                                              |
| $M_v$                  | Water vapor mass (kg)                                                                                                                                       |
| $\rho_s$               | Snow density ( $\text{kg}\cdot\text{m}^{-3}$ )                                                                                                              |
| $h_0$                  | Snow height at initial time (m)                                                                                                                             |
| $H_0$                  | Near-surface boundary height at initial time (m)                                                                                                            |
| $R_s$                  | Ratio between the abundance of heavy isotopes ( $^{18}\text{O}$ and D) and light isotopes ( $^{16}\text{O}$ and H) in the snow reservoir                    |
| $R_v$                  | Ratio between the abundance of heavy isotopes ( $^{18}\text{O}$ and D) and light isotopes ( $^{16}\text{O}$ and H) in the atmospheric water vapor reservoir |
| $R_{Ex}$               | Ratio between the abundance of heavy isotopes ( $^{18}\text{O}$ and D) and light isotopes ( $^{16}\text{O}$ and H) in air-snow vapor exchange flux          |
| $\delta$               | Another denotation of isotopic ratio (‰)                                                                                                                    |
| $\delta S_0$           | Snow isotopic composition at initial time (‰)                                                                                                               |
| $\delta V_0$           | Water vapor isotopic composition at initial time (‰)                                                                                                        |
| $k'$                   | Diffusion coefficient                                                                                                                                       |
| $\alpha_f$             | Efficient fractionation coefficient                                                                                                                         |
| $\alpha_e$             | Equilibrium fractionation coefficient                                                                                                                       |
| $\alpha_k$             | Kinetic fractionation coefficient                                                                                                                           |
| $D_i/D_i'$             | Ratio between the molecular diffusivity of major and minor water isotopic species in air                                                                    |
| $\sigma$               | Stefan-Boltzmann constant ( $\text{W}\cdot\text{m}^{-2}\cdot\text{K}^{-4}$ ), $\sigma = 5.67\times 10^{-8} \text{ W}\cdot\text{m}^{-2}\cdot\text{K}^{-4}$   |
| $\epsilon$             | snow emissivity, $\epsilon = 0.93$                                                                                                                          |
| $LW_{dn}$              | downward longwave radiative fluxes ( $\text{W}\cdot\text{m}^{-2}$ )                                                                                         |
| $LW_{up}$              | upward longwave radiative fluxes ( $\text{W}\cdot\text{m}^{-2}$ )                                                                                           |

## 42 Texts S1. Meteorological data processing

43 At Dome A, air temperature measured at all 3 heights exhibits a harmonic on the  
44 diurnal scale. An interpolation method is thus presented to make a continuous record of  
45 air temperature when observations are missed (e.g., Laepple et al., 2018). The formula  
46 used is as follows:

$$47 T_a = T_{\text{mean}} + A1 \cos(\omega t + \Phi) + A2 \sin(\omega t + \Phi) \quad (\text{S1})$$

48 where  $T_{\text{mean}}$  denotes the daily mean from temperature observations,  $A1$  and  $A2$  are  
49 the amplitude of the harmonics,  $\omega$  and  $t$  is the angular frequency and time,  $\Phi$  denotes  
50 the phase of first harmonics.

51 The observed relative humidity ( $RH_w$ ) at height  $z$  are normalized to the saturation  
52 vapor pressure at the surface temperature. Then they requires previously calibration  
53 when it acts as the super-saturation coefficient for calculating the kinetic fractionation  
54 factor in the model (Eq.15). However, the common correction method developed by  
55 Anderson (1994) fails to capture the super-saturation conditions at temperature  $< -20^\circ\text{C}$   
56 when the AWS probe is affected by frost deposition (Makkonen, 1996; 2005). To solve  
57 the issue, we proposed an improvement method, based on the calibration procedures of  
58 Anderson (1994), to rescale RH at Dome A. The details are follows: 1)  $RH_w$   
59 observations were converted to  $RH_I^0$  using Eq. S2, 2) The  $RH_I^0$  were calibrated using  
60 the ideal maximum  $RH_I$  at each air temperature point ( $RH_I^1 = RH_I^0 / RH_I^{\text{max}}$ ). Note the  
61  $RH_I^{\text{max}}$  was set to the 95<sup>th</sup> percentile of  $RH_I^0$  at each air temperature point, 3) For  
62  $RH_I^1 > 100\%$  (i.e., super-saturation condition),  $RH_I^1$  was multiplied by a factor to  
63 calculate RH as the final result. This factor was the ratio of saturation vapor pressure  
64 over ice at the ambient air temperature. The rising amplitude of the temperature was  
65 depended on comparisons of atmospheric moisture measurements between AWS and  
66 frost-point hygrometer at Dome C (Genthon et al., 2017).

$$67 RH_i = (q_s^w / q_s^i) * RH_w \quad (\text{S2})$$

## 69 Texts S2. Uncertainty analysis

70 At each time step, we firstly calculated the uncertainties of wind speed ( $Q_U$ ), air  
71 temperature ( $Q_{T4m}$ ), relative humidity ( $Q_{RH}$ ) using the hourly AWS observations of  
72 those selected days for each parameter. The same method was also used to estimate the  
73 variability in surface temperature calculations ( $Q_{Ts}$ ). Then the variations of the error of  
74 friction velocity ( $Q_{u^*}$ ), aerodynamic resistance ( $Q_{ra}$ ), latent heat ( $Q_{LE}$ ) and specific  
75 humidity ( $Q_q$ ) were estimated through the error propagation method for a multi-variable  
76 function (e.g., Radic et al., 2017). The uncertainties for those meteorological parameters  
77 can thus be propagated into the final error for  $u^*$ ,  $r_a$ , LE and  $q$ .

78 Based on uncertainty analysis of  $u^*$ ,  $r_a$  and  $q$ , we used a Monte Carlo approach  
79 to quantify uncertainties in the modeled vapor exchange flux ( $E_x$ ). This approach is  
80 model running 1000 times with randomly perturbed values of  $u^*$ ,  $r_a$  and  $q$ . For each  
81 Monte Carlo run, we picked the values of perturbed parameters assuming a normal  
82 distribution of mean values and standard deviations. Then the errors of  $E_x$  can be  
83 presented by a standard deviation of 1000 ensemble runs and labeled as  $Q_{ra}'$ ,  $Q_{u^*}'$  and  
84  $Q_q'$ . Finally, the total error of  $E_x$  was assessed as the root mean sum of these three  
85 individual estimations. The MATLAB code of uncertainty propagation functions are  
86 sourced from [https://www.mathworks.com/matlabcentral/fileexchange/89812-](https://www.mathworks.com/matlabcentral/fileexchange/89812-uncertainty-propagation-functions)  
87 [uncertainty-propagation-functions](https://www.mathworks.com/matlabcentral/fileexchange/89812-uncertainty-propagation-functions) (Joe Klebba, 2022).

88 The same Monte Carlo method were also used to quantify the uncertainties ( $Q_\delta$ )

89 in isotopic values, but with uncertainties of  $E_x$  and effective fractionation coefficient  
90 ( $\alpha_f$ ). Note that the uncertainties of effective fractionation coefficient ( $\alpha_f$ ) were estimated  
91 using error propagation method and observed temperature data.  
92

### 93 Reference

94 Anderson, P. S.: A Method for Rescaling Humidity Sensors at Temperatures Well below  
95 Freezing, *Journal of Atmospheric and Oceanic Technology*, 11(5), 1388-1391, doi:  
96 10.1175/1520-0426(1994)011<1388:AMFRHS>2.0.CO;2, 1994.

97 Genthon, C., Piard, L., Vignon, E., Madeleine, J.-B., Casado, M., & Gallée, H.:  
98 Atmospheric moisture supersaturation in the near-surface atmosphere at Dome C,  
99 Antarctic Plateau, *Atmospheric Chemistry and Physics*, 17(1), 691-704, doi:  
100 10.5194/acp-17-691-2017, 2017.

101 Hughes, A. G., Wahl, S., Jones, T. R., Zuhr, A., Hörhold, M., White, J. W. C., Steen-  
102 Larsen, H. C.: The role of sublimation as a driver of climate signals in the water  
103 isotope content of surface snow Laboratory and field experimental results, *The*  
104 *Cryosphere*, 15(10), 4949-4974, doi: 10.5194/tc-15-4949-2021.

105 Makkonen, L.: Comments on “A Method for Rescaling Humidity Sensors at  
106 Temperatures Well below Freezing, *Journal of Atmospheric and Oceanic*  
107 *Technology*, 13(4), 911–912, doi: 10.1175/1520-  
108 0426(1996)013<0911:COMFRH>2.0.CO;2, 1996.

109 Makkonen, L., & Laakso, T.: Humidity Measurements in Cold and Humid  
110 Environments, *Boundary-Layer Meteorology*, 116(1), 131-147, doi:  
111 10.1007/s10546-004-7955-y, 2005.

112 Ma, Y., Bian, L., Xiao, C., Allison, I., & Zhou, X.: Near surface climate of the traverse  
113 route from Zhongshan Station to Dome A, East Antarctica, *Antarctic Science*,  
114 22(4), 443-459, doi: 10.1017/s0954102010000209, 2010.

115 Laepple, T., Münch, T., Casado, M., Hoerhold, M., Landais, A., & Kipfstuhl, S.: On the  
116 similarity and apparent cycles of isotopic variations in East Antarctic snow pits,  
117 *The Cryosphere*, 12(1), 169-187. doi: 10.5194/tc-12-169-2018, 2018.

118 Pang, H., Hou, S., Landais, A., Masson-Delmotte, V., Jouzel, J., Steen-Larsen, H. C., et  
119 al.: Influence of Summer Sublimation on  $\delta D$ ,  $\delta^{18}O$ , and  $\delta^{17}O$  in Precipitation,  
120 East Antarctica, and Implications for Climate Reconstruction From Ice Cores,  
121 *Journal of Geophysical Research: Atmospheres*, 124(13), 7339-7358, doi:  
122 10.1029/2018JD030218, 2019.

123 Radić, V., Menounos, B., Shea, J., Fitzpatrick, N., Tessema, M. A., & Déry, S. J.:  
124 Evaluation of different methods to model near-surface turbulent fluxes for a  
125 mountain glacier in the Cariboo Mountains, BC, Canada, *The Cryosphere*, 11,  
126 2897–2918, doi: 10.5194/tc-11-2897-2017, 2017.

127 Ritter, F., Steen-Larsen, H. C., Werner, M., Masson-Delmotte, V., Orsi, A., Behrens, M.,  
128 et al.: Isotopic exchange on the diurnal scale between near-surface snow and lower  
129 atmospheric water vapor at Kohnen station, East Antarctica, *The Cryosphere*,  
130 10(4), 1647-1663, doi: 10.5194/tc-10-1647-2016, 2016.

131
