# Supplementary material for: A model framework on atmosphere-snow water vapor exchange and the associated isotope effects at Dome Argus, Antarctica: part I the diurnal changes
Source: Copernicus journal article supplement (doi:10.5194/tc-2023-76), 2023-07-11
Supplement: Supplementary file [file tc-2023-76-AC1-supplement.pdf]

1 **Response to Reviewer #1's comments**

2 **General comments**

3 *This manuscript considers the exchange between water molecules between the firn and*  
4 *the atmosphere, and the impact it can induce on the change of isotopic composition in*  
5 *extremely low accumulation regions of Antarctica. Using the results from Dome C as*  
6 *an analogue for Dome A is a clever strategy that can yield promising results to how to*  
7 *explain the impact of surface processes on the future Dome A ice core. The study takes*  
8 *into account the variations of stability of the atmosphere with systematic calculations*  
9 *of the Richardson number and developed three case studies associated with two sets of*  
10 *summer conditions (clear sky and cloud), and one set of winter conditions.*

11  
12 *While the authors used a rather classical set of equations to evaluate the isotopic*  
13 *exchanges during sublimation and condensation, it seems not pertinent here, as it*  
14 *ignores major contributors to the boundary layer processes and only consider the*  
15 *system as a closed box without exchange with the free atmosphere. As a result, the*  
16 *results do not match the observations that were made for the surface snow isotopic*  
17 *composition at Dome C, even though, it is supposed to be the case study used to*  
18 *parametrise the model.*

19  
20 *I suggest profound modifications to the model, which take into account exchanges*  
21 *between the atmospheric boundary layer and the free atmosphere on top of the surface*  
22 *processes, and which would match the surface snow changes, at least in order of*  
23 *magnitude, before considering the manuscript for publication.*

24  
25 **Response:** We greatly appreciate the reviewer's insightful comment on the physical  
26 mechanism of our model. We agree that realistically exchanges between the  
27 atmospheric boundary layer and the free troposphere on top of the surface processes  
28 should be considered. It was our originally plan that we wanted to explicitly focused on  
29 how much changes on snow isotopes can be induced by processes at the air-snow  
30 interface alone. This may not reflect the real changes but can reveal the most potential  
31 effects associated with the processes at the air-snow interface. Thanks to the reviewer's  
32 suggestion, that we realized that it might be better to include the free troposphere which  
33 will make the result more comparable with the observations. Therefore, in the revised  
34 manuscript, we included the mass exchange between the boundary layer and the free  
35 troposphere by adding a third box as illustrated in the revised Figure 1. The calculations  
36 and equations were also changed to reflect the modifications to the physical  
37 mechanisms in the model. But we wanted to note that, with including the effects of  
38 exchanges between the boundary layer and free troposphere, the main conclusion of the  
39 manuscript doesn't change (the magnitude of modeled changes are affected but still in  
40 the same direction).

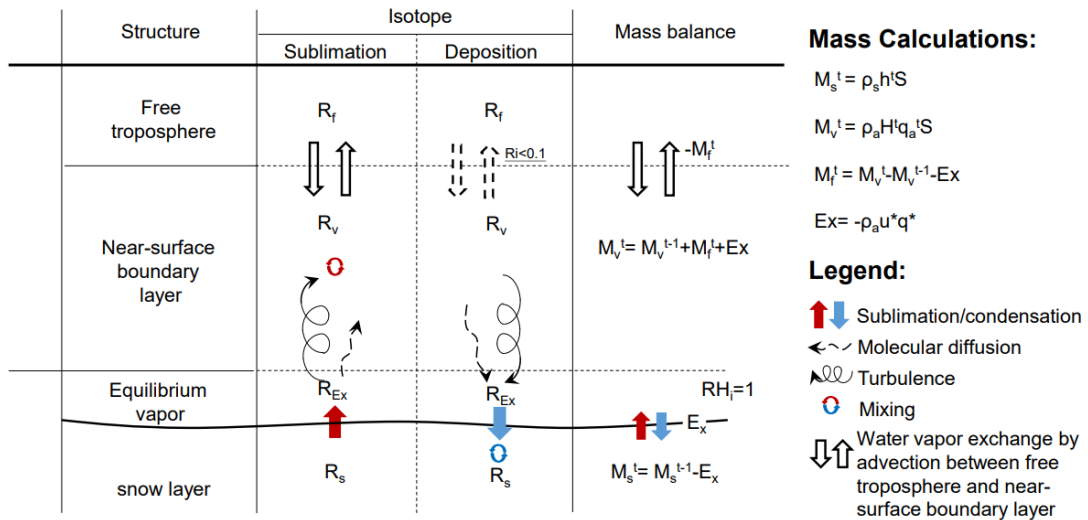

41

42 **Figure 1:** Schematic diagram of the box model used in this study (Revised version).

43

44 **Major Comments:**

45

46 **1)** *The box model developed by the authors was parametrised against vapour measurements obtained at Dome C, in order to compensate for lack of measurements at Dome A. The outputs of the model predict changes of vapour isotopic composition that seem realistic, but it is not the case for the changes of snow isotopic composition for which the variations are extremely small (less than 0.02‰) while the observed changes are around 2‰ during a typical night (Casado et al., 2018). The relative changes of snow and vapour isotopic compositions during a typical clear sky night were modelled in this manuscript, and suggested that a closed box model (which is de facto what the authors have implemented since no exchanges between the free atmosphere and the boundary layer are taken into account) is not realistic for this type of event.*

47

48 **Response:** Thanks for pointing out this. Indeed in the original model framework, the modeled results on snow isotopic changes cannot match the observations. In the revised manuscript, this is addressed by including the effect of exchanges between boundary and free troposphere. In particular, the new results indicate that simulated changes in snow isotopic composition are significantly larger (i.e., ~ 0.02‰ for  $\delta^{18}O$ ) than the original model (i.e., ~ 0.02‰ for  $\delta^{18}O$ ) at Dome C. Especially, for the case the reviewer mentioned, i.e., a typical night with a frost event on 6-7th January 2015, the diurnal changes of newly simulated results between the maximum and minimum can reach 2‰ for snow  $\delta^{18}O$  (as demonstrated in Figure 2). This magnitude is in line with the observations for snow isotopes from Casado et al. (2018) which is ~ 2‰.

49

50 In the revised manuscript, we have re-run all simulations under Dome C conditions and three different cases at Dome A using the adjusted model. The simulated results within a 24-hour period were displayed in Figures 3-6 of the revised manuscript.

51

52

53

54

55

56

57

58

59

60

61

62

63

64

65

66

67

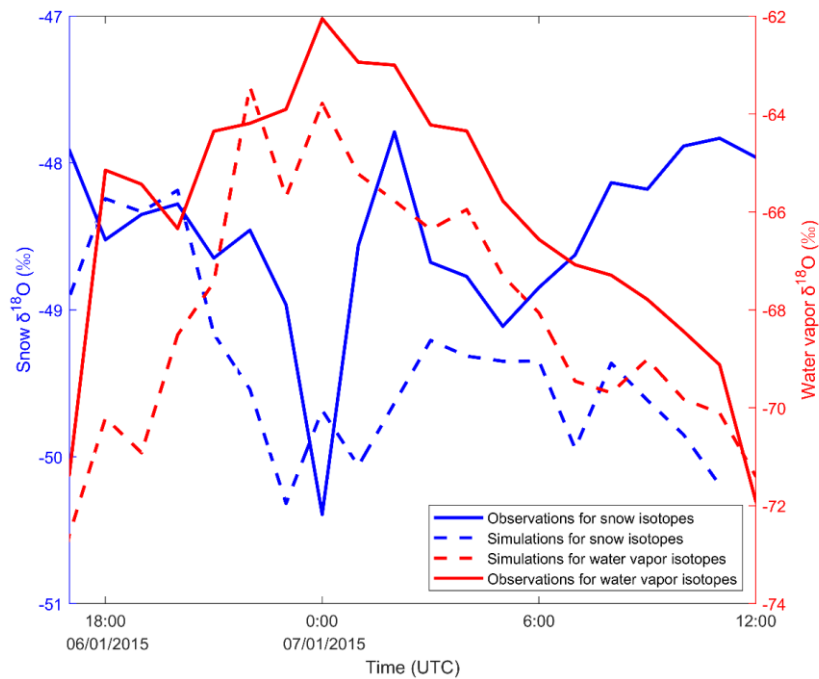

68

69 **Figure 2:** The changes of snow isotopes and water isotopic composition in the near  
70 surface atmospheric layer in Jan 6-7<sup>th</sup>, 2015 at Dome C

71

72 **2)** *Another aspect that suggests that exchanges between the boundary layer and the free*  
73 *atmosphere must happen is the Richardson number. Indeed, for negative Richardson*  
74 *numbers, the atmosphere must be quite convective, which suggest that the boundary*  
75 *layer exchanges with both the surface snow and the free atmosphere.*

76 *The atmosphere is qualified as stable for any positive Richardson number; yet, it seems*  
77 *that some studies suggest that some amount of mixing remains quite strong for  $0 < Ri$*   
78  *$< 0.1$  (Zilitinkevich et al., 2007) . This could be discussed.*

79 **Response:** Thanks for this valuable suggestion. In our original simulations, we  
80 assumed that unstable conditions for atmosphere stability only existed under negative  
81 Richardson numbers. Based on this assumption, we considered how mixing between  
82 the boundary layer, surface snow, and the free troposphere can affect the water vapor  
83 isotopic composition in the near-surface atmospheric layer and snow isotopes during  
84 the warming phase with negative Richardson numbers. However, as pointed by the  
85 reviewer that Zilitinkevich et al. (2008) suggested mixing can occur under positive  
86 Richardson numbers as well. If this is true, our original simulations for the water vapor  
87 isotopic composition in the near-surface atmospheric layer may be underestimated in  
88 the cooling phase.

89 To test the relationship between mixing occurrence conditions and Richardson  
90 numbers, we ran simulations for Dome C taking into account mixing when  $Ri < 0$  and  
91  $Ri < 0.1$ . As shown in Figure 3, the case with  $Ri < 0$  (Case II) indeed underestimates the  
92 water vapor isotopic composition in the near-surface atmospheric layer during the  
93 cooling time. Based on this comparison, in the revised manuscript, we incorporated  
94 mixing into the modeling once  $Ri < 0.1$  (Case I) in addition to the original consideration

95 with  $Ri < 0$ . Discussion on taking into account  $Ri < 0.1$  was added in supplementary  
96 information (Text S3) of the revised manuscript, and in the main text all results were  
97 updated with consideration of the mixing when  $Ri < 0.1$ .  
98

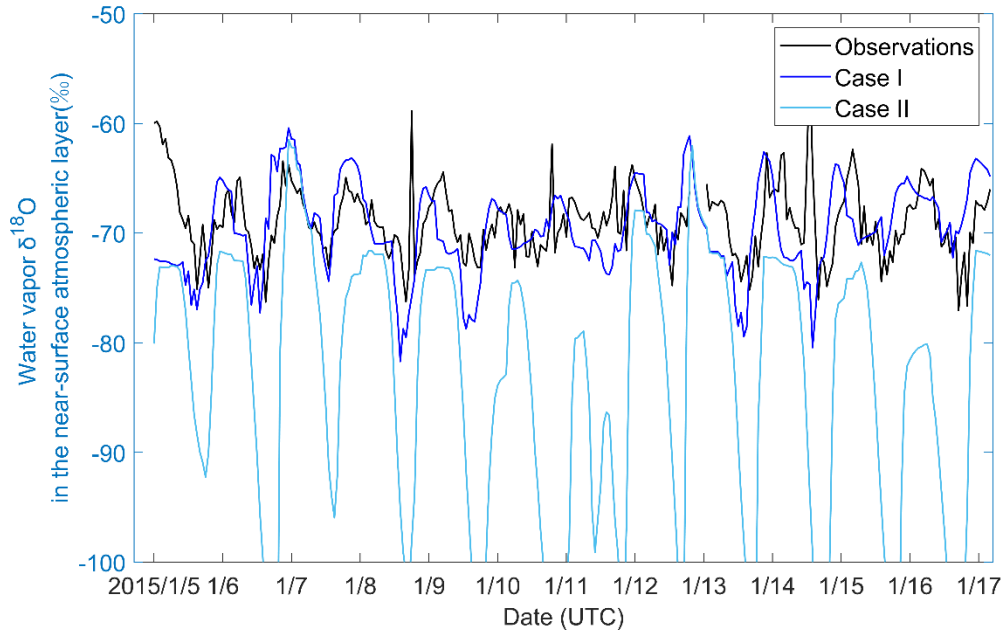

99

100 **Figure 3:** The comparison of water vapor isotopic composition between the simulated  
101 and observed changes at Dome C. Two simulated cases are presented here to discuss  
102 the occurrence condition of mixing. In case I, the mixing is assumed to only happen  
103 when  $Ri < 0$  in the cooling phase, while case II also considers the occurrence of mixing  
104 when  $Ri < 0.1$  in the cooling phase.

105

106 **3)** *Some limited vapour data exist at Dome A (Liu et al., 2022). While these data might  
107 be difficult to compare to your results, in particular consider how high the d-excess is,  
108 which could be associated with calibration issues, it should be discussed.*

109

**Response:** Thanks for this suggestions. Actually before finalizing the manuscript, we  
110 have discussed with the leading author of the Liu et al. (2022) study, but we noted that  
111 due to the harsh environment, direct observations of water vapor as the Liu et al did is  
112 difficult and the calibration can induce large issues. In addition, their measured sites are  
113 actually not exact the same at Dome A (~100 km away). In the end we didn't choose to  
114 compare this dataset. But since the reviewer asked, in the revised manuscript, we  
115 compared our simulations at Dome A with the data of water vapor  $\delta^{18}O$ ,  $\delta D$ , and d-  
116 excess from Liu et al. (2022). We found that both our simulations and observations  
117 exhibit diurnal patterns, with high values occurring during the warming phase (daytime)  
118 and low values during the cooling phase (nighttime). However, we note that the  
119 magnitude of the observed diurnal changes in water vapor  $\delta^{18}O$  and d-excess at sites  
120 near Dome A are very large, over 40‰ and 200‰, respectively. This could be due to  
121 calibration drift caused by the extremely cold and dry conditions during the  
122 measurements at the nearest Dome A site.

123 Therefore, in Section 4 of the revised manuscript, we only qualitative compare and  
124 discuss the similarities and/or differences between simulations and observations,  
125 without delving into quantitative details.

126  
127 **4)** *Considering how fundamental these changes are, an updated version of the*  
128 *manuscript could have completely different conclusions.*

129 **Response:** We really appreciate the reviewer's comments. By including the effect of  
130 exchanges between boundary and free troposphere, the modeled results indeed differ a  
131 lot compared to the original model. However, the modeled changes in snow and vapor  
132 isotopes are still in the same direction (the magnitude or absolute values differ), and the  
133 main conclusion stays the same as that the air-snow exchange would lead to diurnal  
134 variations in atmospheric water vapor  $\delta^{18}\text{O}$  and  $\delta\text{D}$  by  $4.75\pm 2.15\text{‰}$  and  $28.79\pm 19.06\text{‰}$   
135 under summer clear-sky conditions at Dome A, with corresponding diurnal variations  
136 in surface snow  $\delta^{18}\text{O}$  and  $\delta\text{D}$  by  $0.81\pm 0.24\text{‰}$  and  $1.64\pm 2.71\text{‰}$ , respectively. These  
137 values become smaller compared to those in the previous simulations. After 24-hour  
138 simulation, snow water isotopes were enriched under clear-sky conditions. However,  
139 there is no or very little enrichment for snow water isotopes under cloudy conditions,  
140 which is different with the previous simulations. Under winter conditions at Dome A,  
141 the model still indicates the diurnal change in atmospheric and surface snow water  
142 isotopes are not significant, but the model predicts more or less depletions in snow  $\delta^{18}\text{O}$   
143 and  $\delta\text{D}$  in the period of 24-hour simulation, opposite to the results under summer clear-  
144 sky conditions. This suggests that the air-snow vapor exchange tends to enlarge snow  
145 water isotope seasonality.

146  
147 **Supplementary response**

148 The revised figures in the main text are as follows:

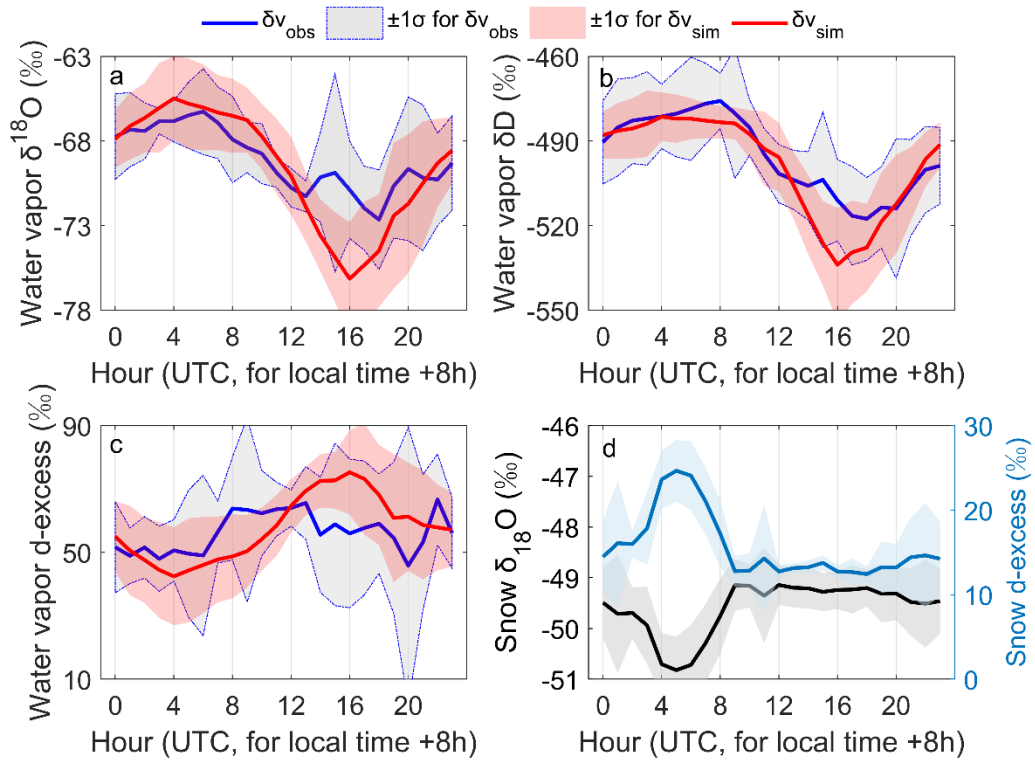

150

151 **Figure 3:** Model simulated diurnal variations of water vapor and snow isotopic  
 152 compositions at Dome C along with the observations. (a) water vapor  $\delta^{18}\text{O}$ , (b) water  
 153 vapor  $\delta\text{D}$ , (c) water vapor d-excess and (d) snow isotopes. In panels (a)-(c), blue solid  
 154 line represents the observations of water vapor isotopic composition ( $\delta v_{\text{obs}}$ ) with the  
 155 light grey shaded area as the uncertainties ( $\pm 1\sigma$ ). The red solid line and the light red  
 156 shaded area depicts the modeled variations of water isotopic composition ( $\delta v_{\text{sim}}$ ) and  
 157 correspondingly uncertainties ( $\pm 1\sigma$ ). In panel (d), the diurnal variations of modeled  
 158 snow  $\delta^{18}\text{O}$  and d-excess are shown as the black solid line and light blue solid line,  
 159 respectively. Their uncertainties are also displayed with shaded areas like  $\delta v_{\text{obs}}$  and  $\delta v_{\text{sim}}$   
 160 in first three panels. The method for uncertainties estimation can be seen in SI (Texts  
 161 S2).

162

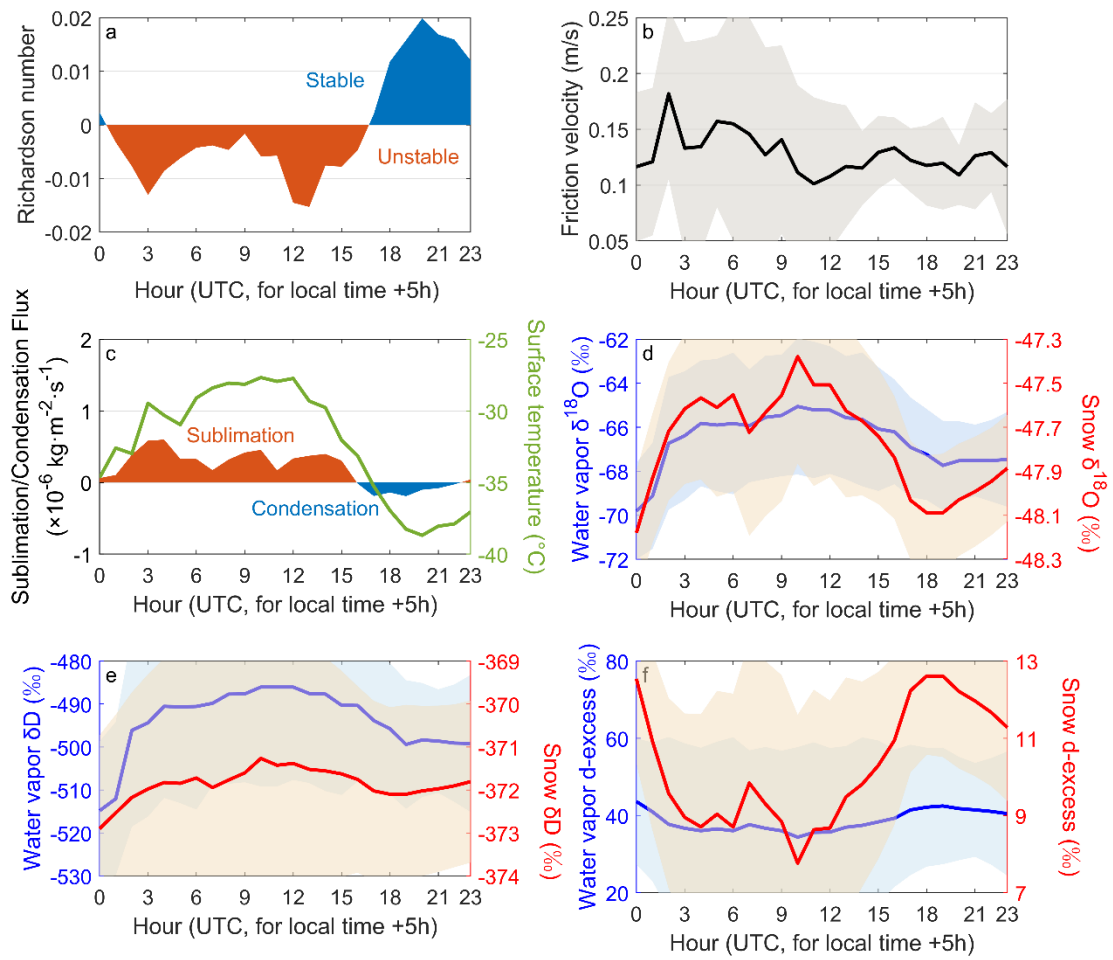

163  
 164  
 165  
 166  
 167  
 168  
 169

**Figure 4:** The simulated hourly mean vapor exchange flux and variations in atmospheric water vapor and snow isotopes under summer clear-sky conditions at Dome A: (a) Richardson number, (b) friction velocity, (c) vapor exchange flux, (d) snow and water vapor  $\delta^{18}\text{O}$ , (e) snow and water vapor  $\delta\text{D}$ , (f) snow and water vapor d-excess. The uncertainties for each variable are displayed by shaded area in each subpanel.

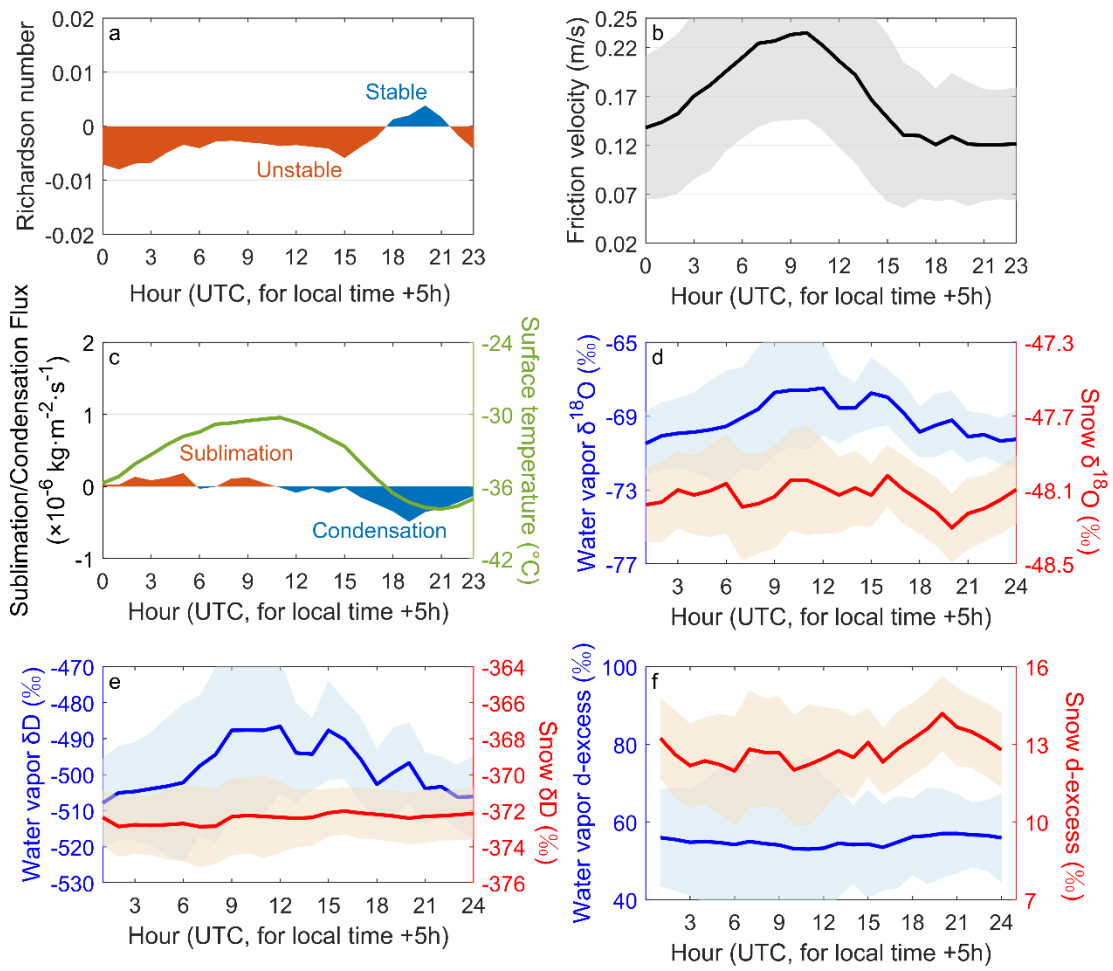

170  
171

**Figure 5:** Same to Figure 4 but for Dome A under highly cloudy conditions in summer.



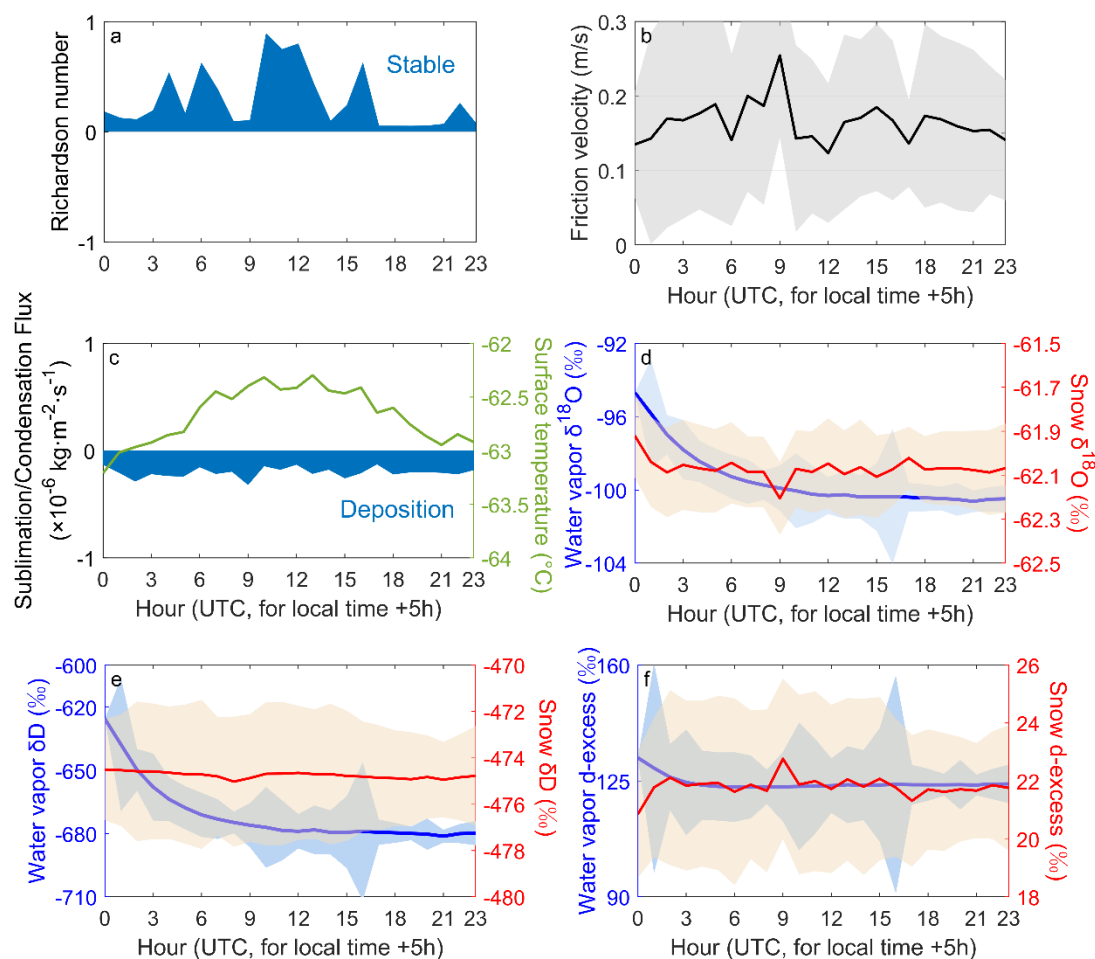

172  
 173  
 174  
 175  
 176  
 177  
 178  
 179  
 180  
 181  
 182  
 183  
 184  
 185  
 186  
 187  
 188  
 189

**Figure 6:** Same to Figure 4 but for Dome A under winter conditions.

**End of the responses to Reviewer #1**

**Reference**

Casado, M., Landais, A., Picard, G., Münch, T., Laepple, T., Stenni, B., et al.: Archival processes of the water stable isotope signal in East Antarctic ice cores, *The Cryosphere*, 12(5), 1745-1766, doi: 10.5194/tc-12-1745-2018, 2018.

Liu J., Du Z., Zhang D., Wang S.: Diagnoses of Antarctic inland water cycle regime: Perspectives from atmospheric water vapor isotope observations along the transect from Zhongshan Station to Dome A, *Frontiers in Earth Science*, 10, doi: 10.3389/feart.2022.823515, 2022.

Zilitinkevich, S.S., Esau, I.N.: Similarity theory and calculation of turbulent fluxes at the surface for the stably stratified atmospheric boundary layer, *Boundary-Layer Meteorology*, 125, 193–205, doi: 10.1007/s10546-007-9187-4, 2007.
