# Supplementary material for: A model framework on atmosphere-snow water vapor exchange and the associated isotope effects at Dome Argus, Antarctica: part I the diurnal changes
Source: Copernicus journal article supplement (doi:10.5194/tc-2023-76), 2023-07-11
Supplement: Supplementary file [file tc-2023-76-AC2-supplement.pdf]

## 1 **Response to Reviewer #3's comments**

### 2 **General comments**

3 **1)** *This manuscript describes a closed box model assuming no atmospheric mixing and*  
4 *simulations of the effect of a mean diurnal cycle at Dome C (using observations) and*  
5 *Dome A (using atmospheric reanalyses and assumptions as inputs). The current title*  
6 *does not reflect the content and the conclusions are not well supported by the analyses*  
7 *and the underlying assumptions in the modelling methodology.*

8 **Response:** Thanks for reviewing the manuscript and the valuable comments. In the  
9 revised manuscript, we have addressed the issue of “no atmospheric mixing” by  
10 including exchanges between the boundary layer and free troposphere. Additionally,  
11 the calculations of isotope mass balance have also been modified following the new  
12 model structure. Using this modified model, we have conducted new simulations at  
13 Dome C and Dome A. The discussion has been reformulated in the revised manuscript  
14 based on the new simulated results and the feedback from the reviewers.

15  
16 **2)** *The long introduction gives a good scene setting for the study, which addresses an*  
17 *important topic, but fails to describe the modelling framework in the context of other*  
18 *studies, and fails to provide a clear comparison of the meteorological and snow*  
19 *conditions between Dome C and Dome A (and what are the similarities and differences*  
20 *that need to be accounted for in comparing results for these two sites, for diurnal*  
21 *variations, clear and cloud sky, and winter vs summer conditions).*

22 **Response:** We would like to express our gratitude to the reviewer for this comment. In  
23 response to the comment, we have made some revisions to the manuscript. Specifically,  
24 in the revised manuscript, we have added a comparison of the meteorological and snow  
25 conditions between Dome C and Dome A in Section 2.2.2. The comparison of isotopic  
26 values for these two sites were also conducted at the result section (Section 3.2).  
27 Additionally, we have included a new paragraph in Section 4 to discuss the similarities  
28 and differences in diurnal variations between these two sites. We hope that these  
29 revisions will enhance the clarity and comprehensiveness of our work.

30 The added statement in Section 4 is as follows:

31 “The diurnal amplitude of water vapor  $\delta D$  across East Antarctic interior region appears  
32 to vary spatially. The modeled value of 28.79‰ at Dome A is slightly less than the  
33 averaged observations of  $36 \pm 6$ ‰ at Kohlen station and the in-situ measurements of  
34  $38 \pm 2$ ‰ at Dome C (Ritter et al., 2016; Casado et al., 2016). The difference between the  
35 two latter locations can be explained by a smaller amplitude of diurnal temperature  
36 cycle (8.7°C) at Kohlen station, relative to that in Dome C (11.1°C). However, there  
37 still exists a discrepancy in water vapor  $\delta D$  amplitude when the peak-valley gap of  
38 diurnal temperature cycle is the same at Dome A and Dome C. Such an anomaly pattern  
39 can be attributed to atmospheric dynamical conditions linked with wind speed. At  
40 Dome A, the daily mean wind speed of 2.8 m/s is lower than 3.3 m/s in Dome C and  
41 4.5 m/s in Kohlen station during summer. A small wind speed corresponds to the  
42 relatively weak air convection in horizontal orientation. Due to the coupling between  
43 upper and lower atmospheric layer, vertical turbulent mixing may decrease with the  
44 weakened air convection in the atmospheric near-surface layer (Casado et al., 2018).

45 This change can attenuate molecular exchange between surface snow and water vapor.  
 46 In parallel, the decrease of vertical turbulence may result in a less efficient turbulent  
 47 diffusion of water molecules and an elevated contribution of molecular diffusion during  
 48 air-snow exchange. Changes in water vapor diffusion pathways increase kinetic  
 49 fractionation and reduce effective isotopic fractionation of water isotopes, leading to a  
 50 muted fluctuation of modelling water vapor  $\delta D$  in combination with less mass exchange.  
 51 The surface snow  $\delta D$  displays the synchronization change and different amplitude in  
 52 diurnal cycles, in accordance with the comparisons of water vapor  $\delta D$  between Dome  
 53 A and Kohlen Station. The similar trend of snow  $\delta D$  is originated from similar  
 54 temperature variations on a diurnal scale, because surface snow isotopic composition is  
 55 mainly influenced by temperature-controlled fractionation of water isotopes during air-  
 56 snow vapor exchange. This relationship also suggests that the difference in temperature  
 57 amplitude could be playing a role in the unequal amplitude of snow  $\delta D$ .”

58

59 **3)** *The description of the model has flaws in the equations for latent heat flux and*  
 60 *possibly in the use of relative humidity in the atmosphere and not relative to surface*  
 61 *temperature for fractionation coefficients. The information provided in supplementary*  
 62 *information is very difficult to understand.*

63 **Response:** Thanks for this comment. We found that the formulations used in the latent  
 64 heat flux calculation is not correct, following Berkowicz and Prahm (1982) (B&P82)  
 65 and the suggestion from the reviewer #2. In addition, the fractionation coefficients  
 66 calculations should rely on the humidity with respect to the surface layer and surface  
 67 temperature, rather than relative humidity and air temperature.

68 In the revised manuscript, we first have made modifications to the calculations of  
 69 latent heat flux. Specifically, we have revised the calculations as follows:

$$70 \quad Ex = LE/Ls = -\rho_a u^* q^* \quad (1)$$

71 where  $\rho_a$  is dry air density varying with observed air temperature ( $T_a$ ) and pressure ( $P_a$ ),  $L_s$  is  
 72 sublimation heat constant,  $u^*$  and  $q^*$  are friction velocity and specific humidity turbulent scale,  
 73 respectively. Where  $u^*$  and  $q^*$  are respectively defined as:

$$74 \quad u^* = \frac{ku_z}{\log\left(\frac{z}{z_0}\right) - \psi_M\left(\frac{z}{L}\right)} \quad (2)$$

$$75 \quad q^* = \frac{k(q_a - q_s)}{\log\left(\frac{z}{z_0}\right) - \psi_M\left(\frac{z}{L}\right)} \quad (3)$$

76 We would also like to apologize for any confusion caused by our imprecise  
 77 description of the relative humidity correction and fractionation coefficients. In the new  
 78 version of the supplementary information, the text description for the relative humidity  
 79 correction have been rewritten to be more clear and accurate. Additionally, we would  
 80 like to clarify that it is the surface snow temperature ( $T_s$ ) that controls isotopic  
 81 fractionation during air-snow vapor exchange. Thus, the surface temperature were used  
 82 to calculate fractionation coefficients, instead of air temperature. We will make the  
 83 necessary corrections to the related description in Section 2.1.1 of the revised  
 84 manuscript.

85 The revised supplementary information for humidity correction are as follows:

86 “The raw data of relative humidity (RH) at height z is the relative humidity with respect  
 87 to the water surface (RH<sub>w</sub>), measured with the HMP35D humidity probe (Xiao et al.,  
 88 2008; Ding et al., 2022). The RH<sub>w</sub> can be expressed as a percentage:

$$89 \quad \underline{RH_w = e_w / e_w^s \times 100\%} \quad (S2)$$

90 where e<sub>w</sub> is the water vapor pressure of air (Pa), and e<sub>w</sub><sup>s</sup> is the saturated vapor pressure  
 91 with respect to the water surface at the air temperature (Pa) which can be calculated  
 92 using the Clausius-Clapeyron equation. When calculating the effective fractionation  
 93 factor (α<sub>f</sub>) in the model (Eq: (15) in the main text), the RH<sub>w</sub> were converted to the  
 94 relative humidity over ice at the temperature of the air (RH<sub>i</sub>). The conversion between  
 95 RH<sub>i</sub> and RH<sub>w</sub> was proposed based on the calibration procedures of Anderson et al.  
 96 (1984). The details are as follows: 1) The RH<sub>w</sub> observations were firstly rescaled using  
 97 the maximum RH<sub>w</sub> of all measured values at each air temperature point (T<sub>a</sub>),

$$98 \quad \underline{RH_w' = RH_w(T_a) / RH_w^{max}(T_a)} \quad (S3)$$

99 2) RH<sub>w</sub>' values were then converted to RH<sub>i</sub> using Eq: (S4) :

$$100 \quad \underline{RH_i = (e_w^s(T_a) / e_i^s(T_a)) \times RH_w'} \quad (S4)$$

101 where e<sub>i</sub><sup>s</sup> represents the saturated vapor pressure with respect to ice at the air  
 102 temperature (Pa). Like e<sub>w</sub><sup>s</sup>, e<sub>i</sub><sup>s</sup> was calculated by the Clausius-Clapeyron equation.  
 103 Based on Eq: (S3) and Eq: (S4), we obtained RH<sub>i</sub> as the final result.

104 In addition, the relative humidity of the air with respect to the surface temperature  
 105 (h) in Eq: (14) can also be converted from RH<sub>w</sub> observations. The first step of  
 106 procedures for h conversion is the rescaling RH<sub>w</sub> based on Eq: (S3), same to the RH<sub>i</sub>  
 107 conversion. The second step is h calculation using the saturated vapor pressure with  
 108 respect to ice at the surface temperature (Eq: (S5)).

$$109 \quad \underline{h = (e_w^s(T_a) / e_i^s(T_s)) \times RH_w'} \quad (S5)$$

110

111 **4) The choice of performing simulations driven by a mean diurnal cycle instead of using**  
 112 **the actual wealth of observations is unclear and the implications should be discussed.**  
 113 **I am puzzled by how wind effects are accounted for when averaging conditions.**

114 **Response:** Thanks for this comment. We chose to use the mean stacked conditions to  
 115 conduct simulation since we wanted to highlight the effects of air-snow exchange in a  
 116 general case. But in order to avoid confusion, in the revised manuscript, the simulations  
 117 were conducted using continuous meteorological input for each individual day during  
 118 the studied period at Dome C. This allowed us to calculate the average diurnal changes  
 119 in water vapor isotopic composition and snow isotopes. However, for the Dome A case,  
 120 the selected days for clear-sky, cloudy, and winter conditions were not continuous,  
 121 making it difficult to conduct simulations as was done for Dome C. Instead, we were  
 122 only able to use the model for one day to simulate the diurnal changes in snow and  
 123 water vapor isotopes, after a week of spin-up time (as shown in Figures 4-6 in the

124 revised manuscript). This allows to evaluate the effects of air-snow exchange under  
125 representative meteorological conditions.

126 In addition, we also reconsidered the effect of wind speed on simulations during  
127 atmosphere-snow water vapor exchange. In the revised manuscript, a new case  
128 simulation was presented to test the effect of wind speed variability on atmosphere-  
129 snow water vapor exchange. Specifically, we analyzed the response of water vapor and  
130 snow isotopic composition to the conditions of 1) a significant diurnal cycle of wind  
131 versus that with averaged wind speed. The results, as shown in Figure 1, suggest that  
132 strong variability in wind speed will enlarge the variations in latent heat, leading to a  
133 more significant diurnal change in water vapor isotopes and snow isotopes, but the for  
134 a longer time, there would be days with diurnal wind cycle both smaller or bigger than  
135 the mean, so the result with the mean wind pattern is more representative.

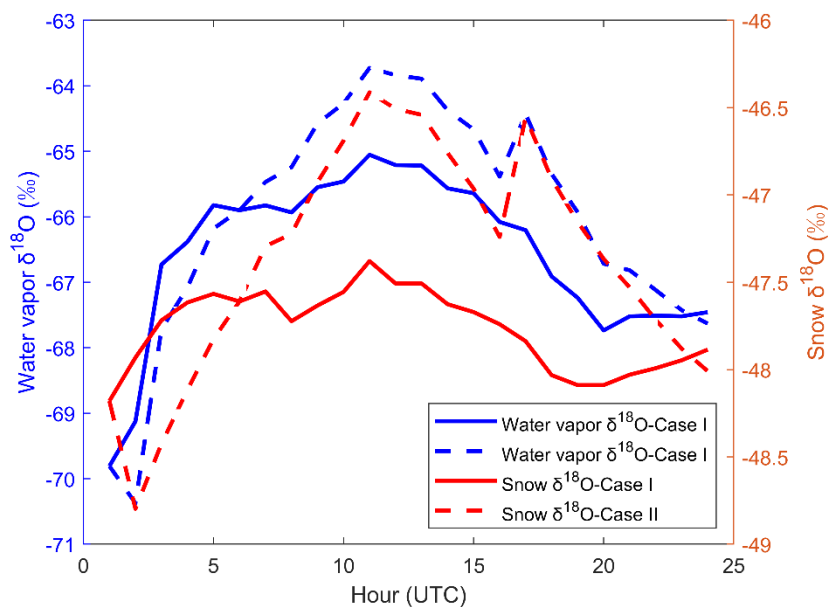

136

137 **Figure 1:** The comparison of water vapor isotopic composition between two simulated  
138 cases at Dome A. The simulations in two cases were driven using the averaged wind  
139 speed (Case I) and the strong diurnal changes in wind speed (Case II).

140

141 **5)** *There should be at least a more detailed comparison between the Dome C and Dome*  
142 *A characteristics (including comparison of meteorological conditions and ERA5 results*  
143 *at both sites), instead of current Table 1 (where assumptions versus observational based*  
144 *information should be differentiated).*

145 **Response:** Thanks for this suggestion. In the revised manuscript, we have added  
146 content to compare the meteorological conditions at Dome C and Dome A in Section  
147 2.2.2, and the impacts of these conditions on the modeled water vapor and snow  
148 isotopes are discussed in Section 4.

149

150 **6)** *The assumptions displayed in Figure 1 should be discussed in the context of available*  
151 *information, including the Richardson number, regarding atmospheric exchanges (the*  
152 *closed box assumption validity).*

153 **Response:** Thanks for the valuable suggestion. We have incorporated these into the  
154 revised manuscript by discussing the assumptions related to the occurrence conditions  
155 of the air-mass renewal process associated with the Richardson number, as well as the  
156 isotopic fractionation during sublimation and deposition. Additionally, we have  
157 addressed the setting of initial conditions through some original and new sensitivity  
158 tests.

159 Here, we will provide the discussion of the occurrence conditions of the air-mass  
160 renewal process in the supplementary information:

161 “To determine the correlation between mixing occurrence conditions and Richardson  
162 numbers, we ran simulations for Dome C, taking into account mixing when  $Ri < 0$  and  
163  $Ri < 0.1$ . As shown in Figure 2, the case with  $Ri < 0$  did indeed underestimate the water  
164 vapor isotopic composition in the near-surface atmospheric layer during the cooling  
165 time. Based on this comparison, we incorporated mixing into the modeling once  $Ri < 0.1$ .”

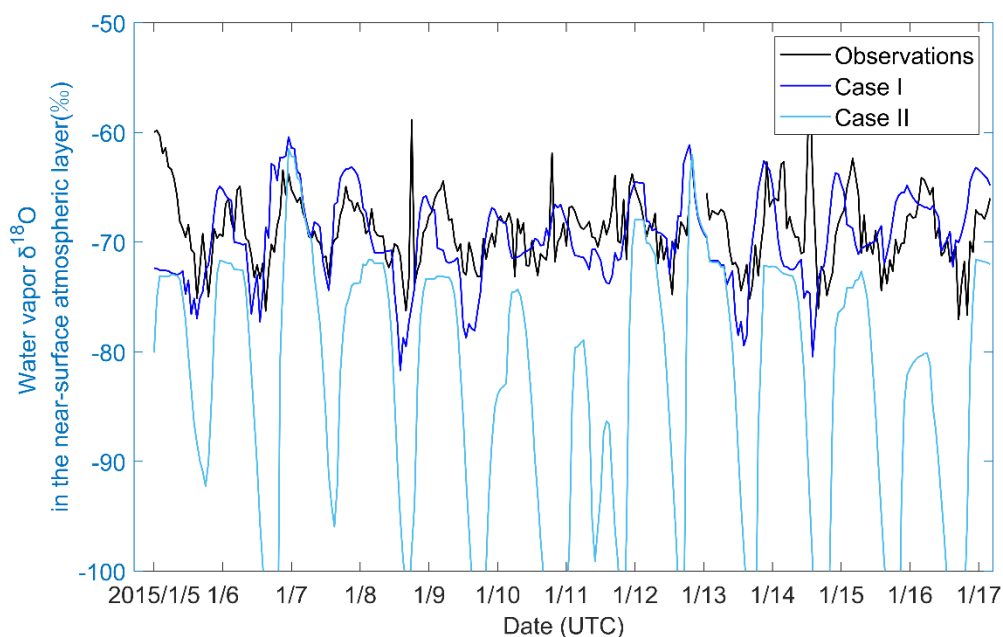

166

167 **Figure 2:** The comparison of water vapor isotopic composition between the simulated  
168 and observed changes at Dome C. Two simulated cases are presented here to discuss  
169 the occurrence condition of mixing. In the case I, the mixing is assumed to happen when  
170  $Ri < 0$  in the cooling phase. The case II for the occurrence conditions of mixing is  $Ri < 0.1$   
171 in the cooling phase.

172

173 *7) The authors should reflect on what their model explicitly implies in terms of*  
174 *behaviour, and what is effectively "validated" from their approach which does not*  
175 *resolve the diurnal variations in snow measured at Dome C. This physics-based*  
176 *approach is missing.*

177 **Response:** Thank you for bringing this to our attention. We have resolved the issue by  
178 making modifications to the physical mechanism of our model (Figure 1), as outlined  
179 in our previous response to general comments. We then conducted simulations under  
180 Dome C conditions and three different cases at Dome A using the updated model. The  
181 simulated results for a 24-hour period are presented in Figures 3-6 of the main text (at

182 the end of this response). The new results indicate that the changes in snow isotopic  
 183 composition are significantly greater than the original  $\delta^{18}\text{O}$  simulations of 0.02‰ at  
 184 Dome C. During a typical night, such as the frost event on January 6-7, 2015, the diurnal  
 185 changes of the newly simulated results between the maximum and minimum can reach  
 186 2‰ for snow  $\delta^{18}\text{O}$  (as shown in Figure 3). This magnitude is consistent with the  
 187 observations for snow isotopes from Casado et al. (2018).

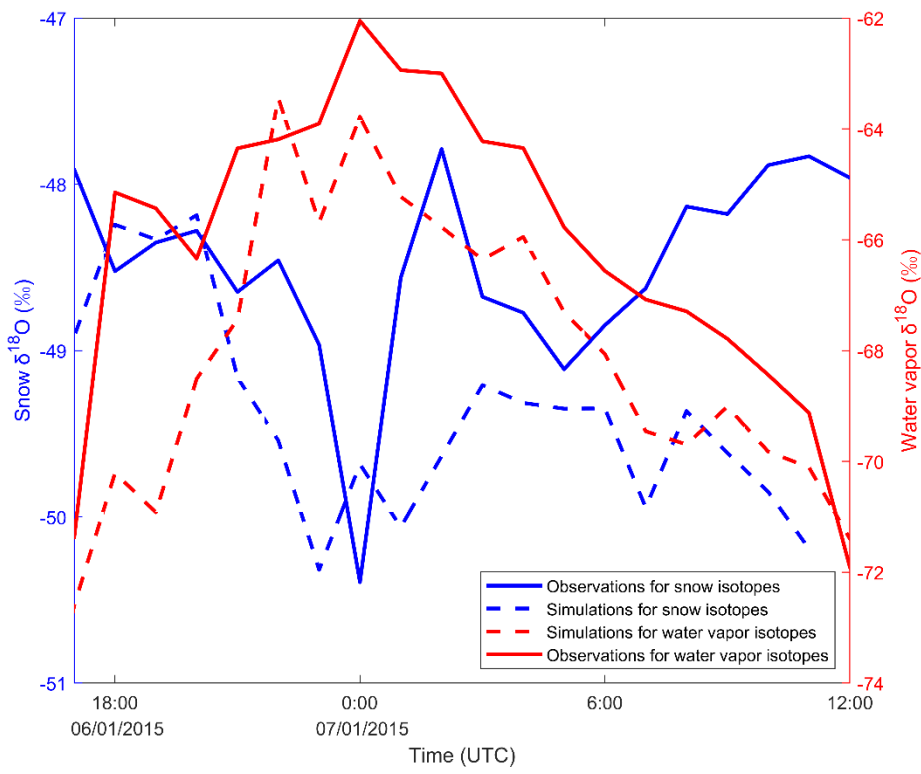

188  
 189 **Figure 3:** The changes of snow isotopes and water isotopic composition in the near  
 190 surface atmospheric layer during the 6-7th Jan, 2015 at Dome C.  
 191

192 **8)** For these reasons, major revisions are needed, first to ensure accurate equations in  
 193 the model, and then to reflect on the limitations and suitability of the core assumptions  
 194 of the closed box model to address these questions, and third regarding the average  
 195 diurnal cycle approach, and fourth regarding the detailed comparison between Dome  
 196 C and Dome A (well beyond "validating" and "applying" this model at the two sites).

197 **Response:** Thank you for the helpful comment. Several significant changes were made  
 198 to the model structure to reflect reviewer's suggestions. Specifically, we have added a  
 199 third box to represent the free atmosphere layer. The calculations and equations were  
 200 also updated to reflect the modifications made to the physical mechanism of the model.  
 201 We also have presented new assumptions for initial conditions and air mass renewal  
 202 occurrence conditions, which enable the model to run effectively. Furthermore, the  
 203 simulations were continuously conducted using meteorological observations recorded  
 204 hourly. Finally, we have included a comparison between Dome C and Dome A in the  
 205 Discussion section of the revised manuscript (Details can be seen in response to  
 206 Comment #2 and Comment #6). After all of these modifications, in addition to that  
 207 arisen by other reviewers, the main conclusion of the manuscript stays the same: The

208 diurnal variations in atmospheric water vapor  $\delta^{18}\text{O}$  and  $\delta\text{D}$  can reach  $4.75\pm 2.15\text{‰}$  and  
 209  $28.79\pm 19.06\text{‰}$  under summer clear-sky conditions at Dome A, with corresponding  
 210 diurnal variations in surface snow  $\delta^{18}\text{O}$  and  $\delta\text{D}$  by  $0.81\pm 0.24\text{‰}$  and  $1.64\pm 2.71\text{‰}$ ,  
 211 respectively. After 24-hour simulation, snow water isotopes were enriched under clear-  
 212 sky conditions. However, there is no or very little enrichment for snow water isotopes  
 213 under cloudy conditions. Under winter conditions at Dome A, the model still indicates  
 214 the diurnal change in atmospheric and surface snow water isotopes are not significant,  
 215 but the model predicts more or less depletions in snow  $\delta^{18}\text{O}$  and  $\delta\text{D}$  in the period of 24-  
 216 hour simulation, opposite to the results under summer clear-sky conditions. This  
 217 suggests that the air-snow vapor exchange tends to enlarge snow water isotope  
 218 seasonality.

219

### 220 Supplementary response

221 The revised figures in the main text are as follows:

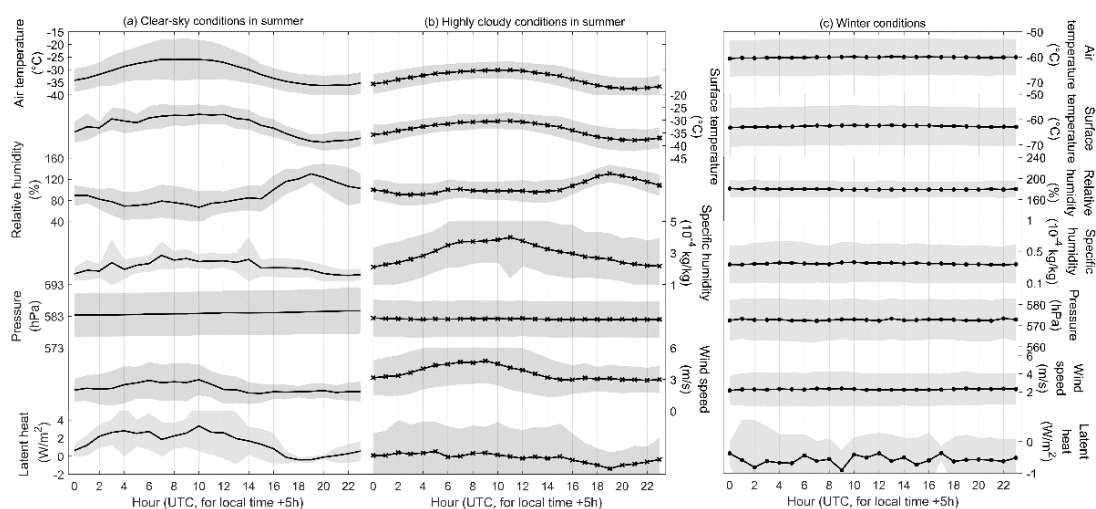

222

223 **Figure 2:** Stacks of diurnal cycles of meteorological parameters and the calculated  
 224 latent heat under summer clear-sky conditions (a), summer highly cloudy conditions  
 225 (b), and winter conditions (c) at Dome A. The hourly data for air temperature, relative  
 226 humidity, air pressure and wind speed were averaged by AWS observations over those  
 227 selected days. The diurnal variations for other three parameters were calculated based  
 228 on hourly observations. In each panel, the solid line with marks represents the average  
 229 and the grey shadow is the standard deviation. The background color of pink and blue  
 230 corresponds to the period dominated by sublimation and deposition, respectively, in a  
 231 diurnal cycle.

232

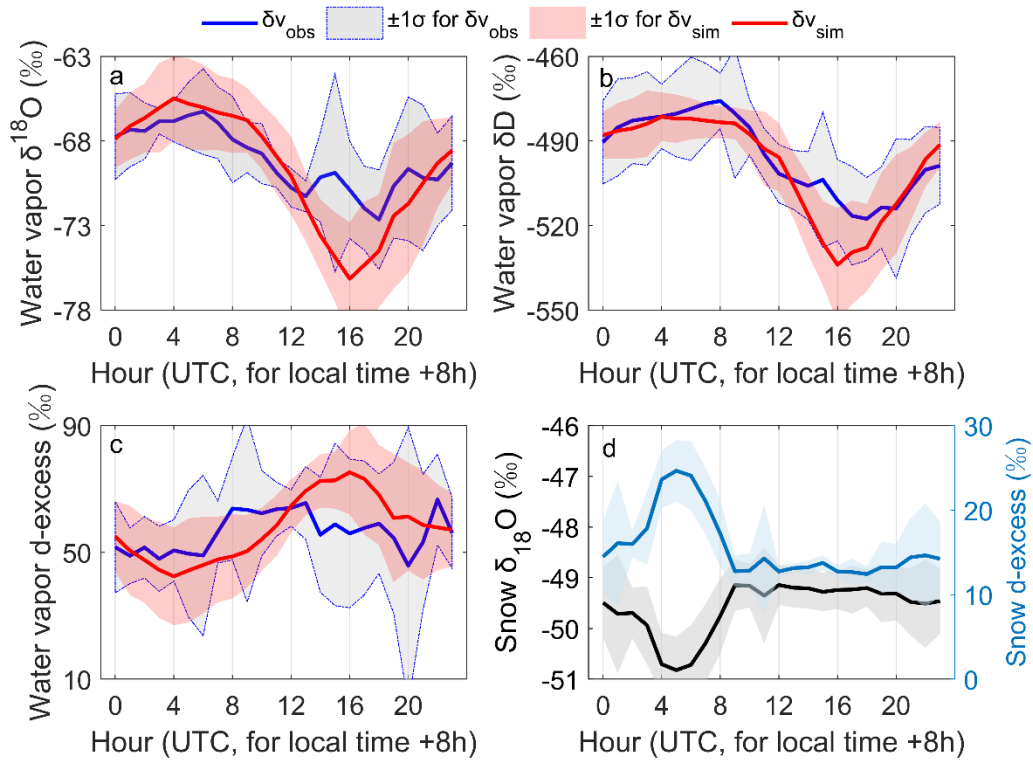

233

234

**Figure 3:** Model simulated diurnal variations of water vapor and snow isotopic compositions at Dome C along with the observations. (a) water vapor  $\delta^{18}\text{O}$ , (b) water vapor  $\delta\text{D}$ , (c) water vapor d-excess and (d) snow isotopes. In panels (a)-(c), blue solid line represents the observations of water vapor isotopic composition ( $\delta v_{\text{obs}}$ ) with the light grey shaded area as the uncertainties ( $\pm 1\sigma$ ). The red solid line and the light red shaded area depicts the modeled variations of water isotopic composition ( $\delta v_{\text{sim}}$ ) and correspondingly uncertainties ( $\pm 1\sigma$ ). In panel (d), the diurnal variations of modeled snow  $\delta^{18}\text{O}$  and d-excess are shown as the black solid line and light blue solid line, respectively. Their uncertainties are also displayed with shaded areas like  $\delta v_{\text{obs}}$  and  $\delta v_{\text{sim}}$  in first three panels. The method for uncertainties estimation can be seen in SI (Texts S2).

244

245



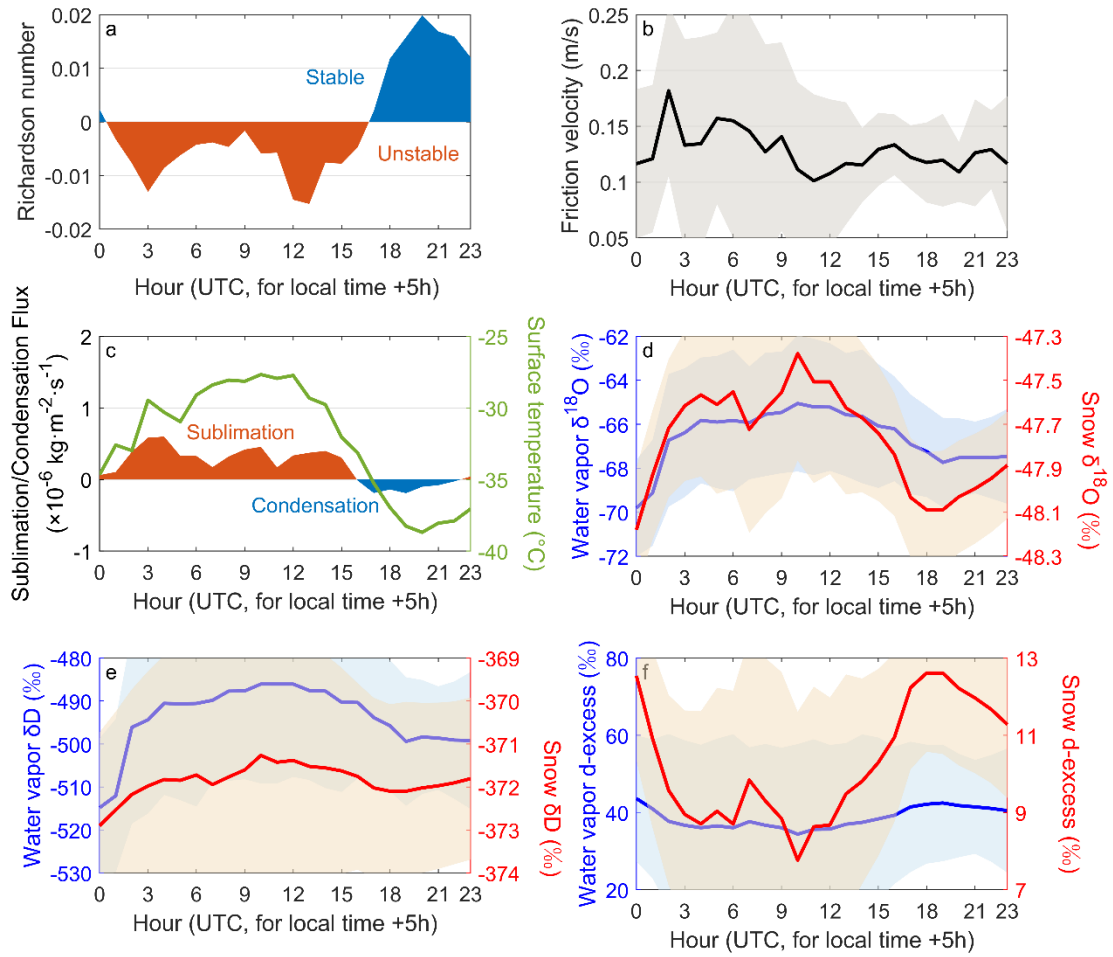

246

247

248 **Figure 4:** The simulated hourly mean vapor exchange flux and variations in

249 atmospheric water vapor and snow isotopes under summer clear-sky conditions at

250 Dome A: (a) Richardson number, (b) friction velocity, (c) vapor exchange flux, (d) snow

251 and water vapor  $\delta^{18}\text{O}$ , (e) snow and water vapor  $\delta\text{D}$ , (f) snow and water vapor d-excess.

252 The uncertainties for each variable are displayed by shaded area in each subpanel.

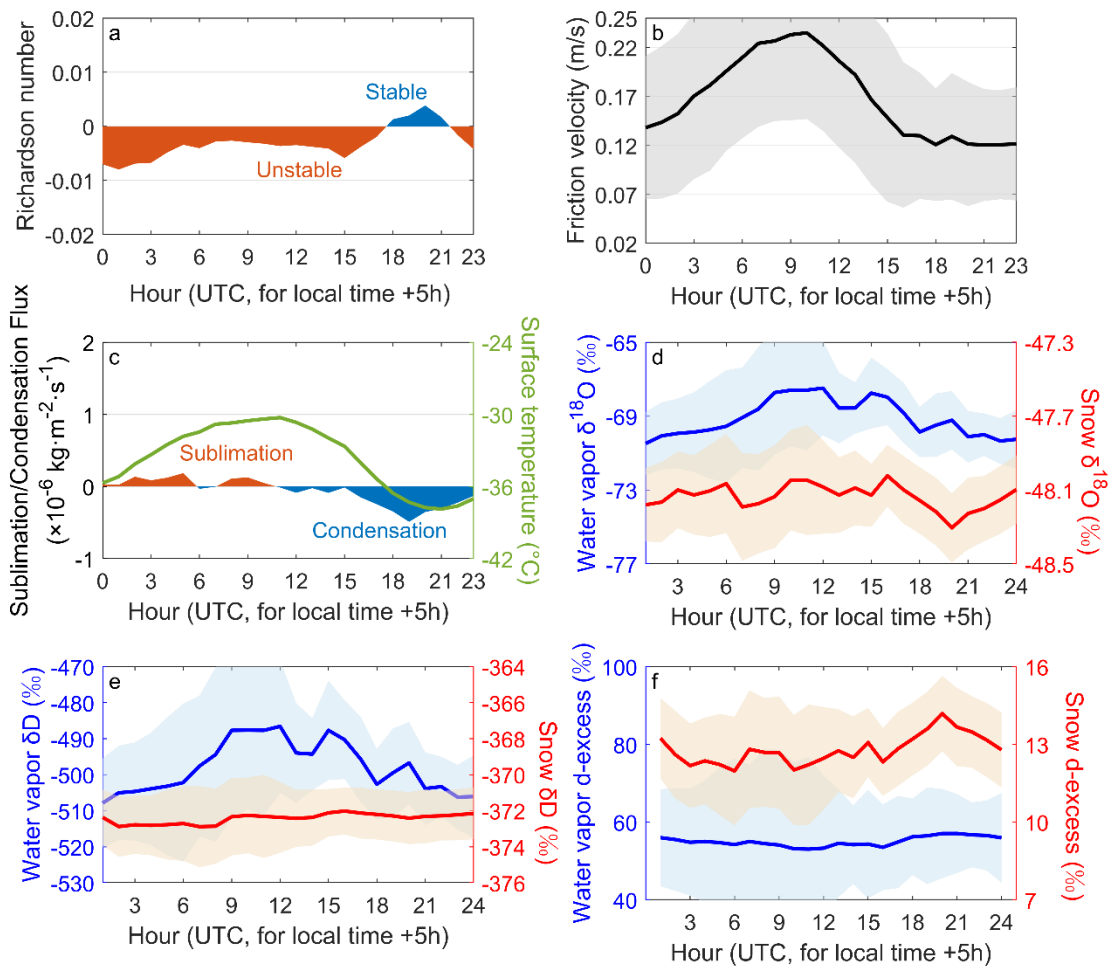

253  
254

**Figure 5:** Same to Figure 4 but for Dome A under highly cloudy conditions in summer.

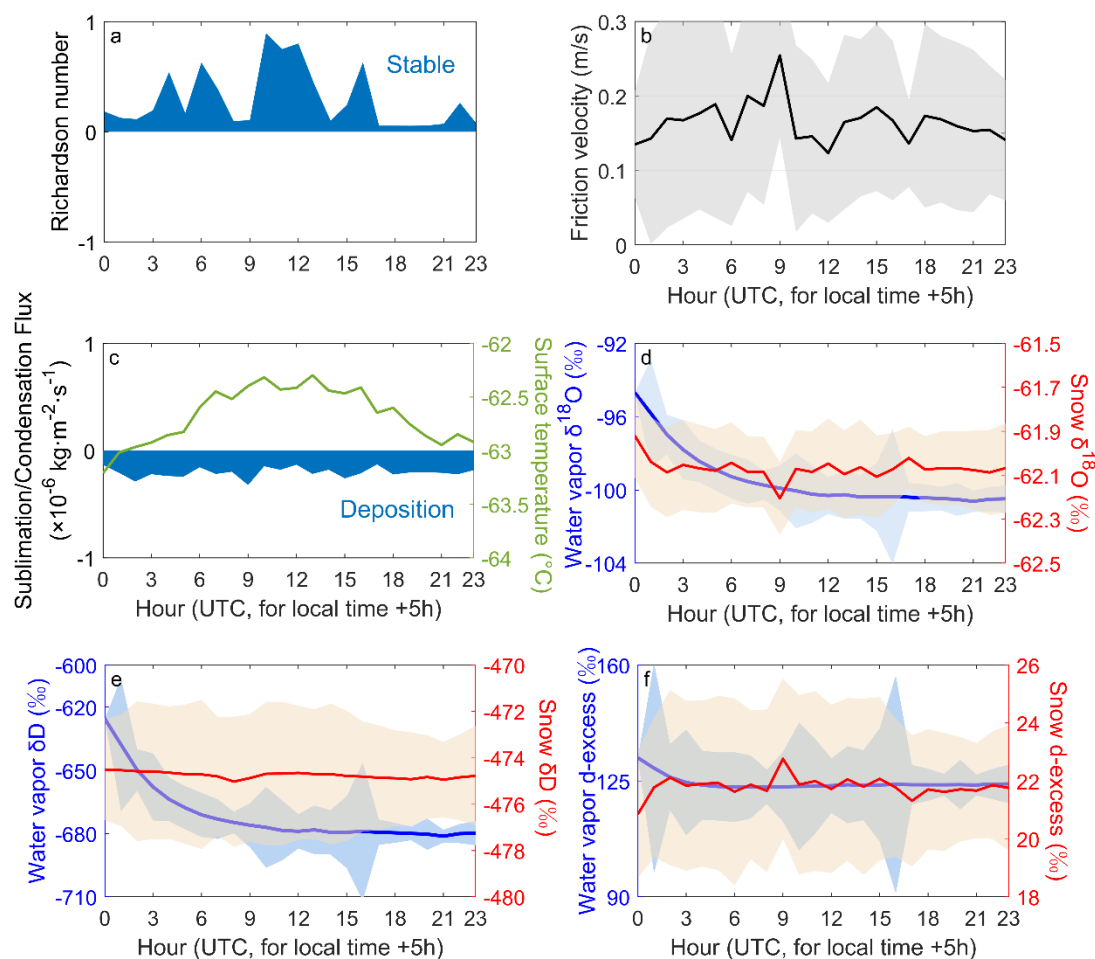

255

256

**Figure 6:** Same to Figure 4 but for Dome A under winter conditions.

257

258

259 **End of the responses to Reviewer #3**

260

261 **Reference**

262 Casado, M., Landais, A., Picard, G., Münch, T., Laepple, T., Stenni, B., et al.: Archival  
 263 processes of the water stable isotope signal in East Antarctic ice cores, *The*  
 264 *Cryosphere*, 12(5), 1745-1766, doi: 10.5194/tc-12-1745-2018, 2018.

265 Ritter, F., Steen-Larsen, H. C., Werner, M., Masson-Delmotte, V., Orsi, A., Behrens, M.,  
 266 et al.: Isotopic exchange on the diurnal scale between near-surface snow and lower  
 267 atmospheric water vapor at Kohnen station, East Antarctica, *The Cryosphere*,  
 268 10(4), 1647-1663, doi: 10.5194/tc-10-1647-2016, 2016.

269 Wahl, S., Steen-Larsen, H. C., Reuder, J., & Hörhold, M.: Quantifying the Stable Water  
 270 Isotopologue Exchange Between the Snow Surface and Lower Atmosphere by  
 271 Direct Flux Measurements, *Journal of Geophysical Research: Atmospheres*,  
 272 126(13), doi: 10.1029/2020jd034400, 2021.

273
