# Supplementary material for: A model framework on atmosphere-snow water vapor exchange and the associated isotope effects at Dome Argus, Antarctica: part I the diurnal changes
Source: Copernicus journal article supplement (doi:10.5194/tc-2023-76), 2023-07-11
Supplement: Supplementary file [file tc-2023-76-AC3-supplement.pdf]

## 1 **Response to Reviewer #2's comments**

### 2 **General comments**

3 **1)** *My main concern is that the way the authors word their conclusions and their title*  
4 *suggests they provided model estimates of the diurnal variations in the snow and vapor*  
5 *isotopes. In fact, presented simulations are driven by average diurnal cycles of the*  
6 *meteorological parameters. Thus, instead, the authors provide the impact of an average*  
7 *day on initialized snow and vapor isotopes. The presented current results show how a*  
8 *given initial surface snow and vapor isotopic composition could develop within the first*  
9 *24 hours when applying water vapor exchange.*

10 *It is unclear to me why the authors didn't run the simulation based on the*  
11 *meteorological input of individual days instead of stacking and averaging the input*  
12 *data. This limits the simulation time to only 24 hours. Such a short time does not allow*  
13 *for the development of the snow surface over several days. I would consider a minimum*  
14 *of a week spinup time to perform a model simulation in a more equilibrated state as*  
15 *could be expected in nature.*

16 *The intuitive approach to obtain an estimate of the average diurnal impact on the*  
17 *isotopes would be to run a longer simulation over several days and give the average*  
18 *daily impact. It seems to me that the authors have the needed data and tools to provide*  
19 *a model simulation over several days, as suggested above. This will improve the*  
20 *manuscript's relevance and provide better applicability of their results to explain*  
21 *observed changes in the snow isotopic composition.*

22 **Response:** We appreciate the reviewer's insightful comments. In the original  
23 manuscript, we chose to use the mean stacked conditions to conduct simulation since  
24 we wanted to highlight the effects of air-snow exchange in a general case. But in order  
25 to avoid confusion, in the revised manuscript, the simulations were conducted using  
26 continuous meteorological input for each individual day during the studied period at  
27 Dome C, where the model was run during the entire studied period (Jan 5th to Jan 16th,  
28 2015), and the simulated results were stacked and averaged to evaluate the changes in  
29 snow and water vapor isotopes within a 24-hour period, as shown in Figure 3 of the  
30 revised manuscript. The model performance in water vapor isotopic variations is better  
31 than the simulations in the original manuscript. For snow isotopic composition, the  
32 diurnal evolution of simulated results can basically match with observations in the order  
33 of magnitude during a typical frost event (Figure 2 in this response).

34 In the Dome A simulations, however, the selected days for clear-sky, cloudy, and  
35 winter conditions were not continuous, making it difficult to conduct simulations as  
36 was done for Dome C. Instead, we were only able to use the model for one day to  
37 simulate the diurnal changes in snow and water vapor isotopes, after a week of spin-up  
38 time. This allows to evaluate the effects of air-snow exchange under representative  
39 meteorological conditions. It is important to note that the input meteorological  
40 conditions and latent heat flux during both the spin-up time and the simulated period at  
41 Dome A were obtained from stacking observations or calculations on selected days, due  
42 to the non-continuous clear-sky and cloudy days in the studied period. Furthermore, the  
43 choice of the modeling running day and duration can significantly influence the final  
44 results of snow and water vapor isotopic composition, as meteorological conditions and

45 latent heat flux vary significantly between two different days within a season. To  
 46 mitigate this effect, it is recommended to use the averaged meteorological conditions  
 47 to run simulations at Dome A. These approaches at least provide some, on average,  
 48 quantitative information on the isotopic effects of atmospheric-snow water vapor  
 49 exchanges at Dome A.

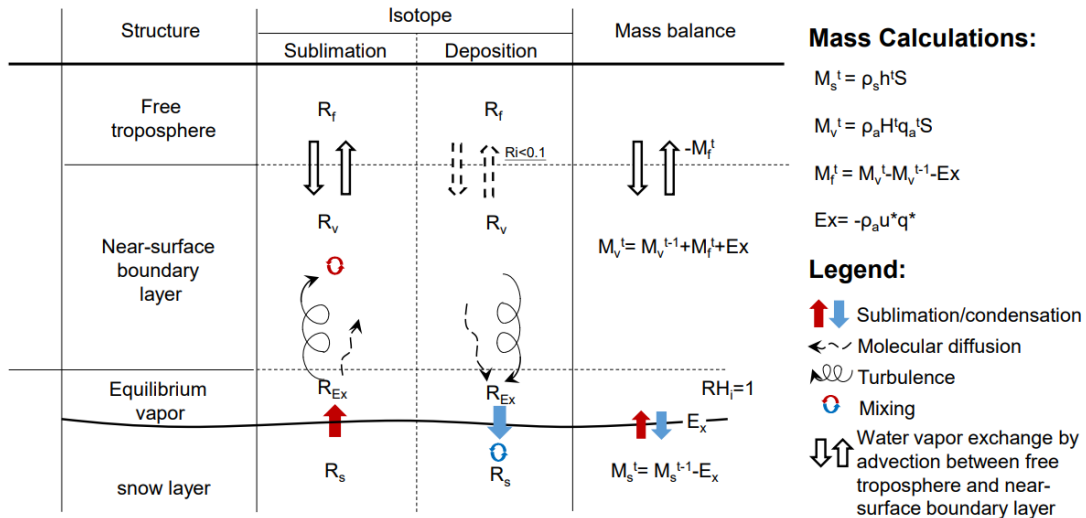

50

51 **Figure 1.** Schematic diagram of the box model used in this study (Revised version).

52

53 **2)** Secondly, there are errors in the calculation of the latent heat flux as well as the  
 54 calculation of the isotopic flux. Please see the details below. In addition, to my  
 55 understanding, the latent heat flux is calculated based on already stacked and averaged  
 56 meteorological data. Since the latent heat flux is non-linearly dependent on these  
 57 meteorological parameters, the resulting flux based on the averages can diverge  
 58 severely from a diurnal average of the latent heat flux resulting from hourly calculations.  
 59 The presented simulations need to be re-run using the corrected latent heat flux  
 60 calculation.

61 **Response:** We would like to express our gratitude to the reviewer for bringing to our  
 62 attention the errors in the calculations of latent heat flux and isotope flux. We have taken  
 63 into account the detailed comments provided in this response and have made the  
 64 necessary corrections to the equations for these parameters in the revised manuscript.

65 As part of our revisions, we have also changed the calculation method for the latent  
 66 heat flux and isotope flux for Dome C. Instead of using stacked and averaged  
 67 meteorological data within 24 hours, we now use continuous meteorological input for  
 68 individual days over the studied period. For the Dome A simulations, the latent heat  
 69 flux calculations remain the same as the Dome C simulation cases. However, the  
 70 isotope flux was obtained by stacked and averaged latent heat flux data due to the  
 71 selection of cloud conditions (Comment #1). These changes in the calculation method  
 72 can provide more accurate changes in the flux parameters on a diurnal scale.  
 73 Furthermore, the uncertainties of these parameters can be easily estimated by  
 74 calculating the standard deviation of the simulated results on the given days. More  
 75 details on this can be found in Comment #52 of this response.

76

77 **3)** *Another concern is that even when the above-mentioned errors in the latent heat flux*  
78 *calculation are corrected, the conditions for the Monin-Obukov similarity theory*  
79 *(MOST) are often violated under polar conditions. The present study does not discuss*  
80 *the quality of the calculated latent heat flux. If the authors pursue the goal of providing*  
81 *as realistic estimates of the water vapor exchange on the isotopes as possible, they have*  
82 *to make sure that the quality of the driving parameter, the latent heat flux, is well*  
83 *evaluated for similar conditions.*

84 **Response:** Thanks the reviewer for this comments. Indeed, the eddy covariance (EC)  
85 technique is a more robust method for quantifying latent heat fluxes and calculating  
86 isotopic fluxes at the atmosphere-snow interface, as demonstrated by Whal et al. (2021).  
87 However, this technique heavily relies on specialized measurement instruments,  
88 making it difficult to determine the latent heat flux in the absence of such instruments.  
89 As a result, high-quality latent heat flux data is not available at most polar sites.

90 Alternatively, the Monin-Obukhov similarity theory (MOST) are widely applied  
91 in polar regions because it calculates the latent heat flux based solely on meteorological  
92 parameters. While it seems not to be very suitable under polar conditions especially in  
93 winter, some previous studies have used the bulk method and MOST to calculate  
94 surface fluxes and the results were reasonable. For example, the King and Anderson  
95 (1994) study indicated that MOST can well describe the winter heat and water vapor  
96 fluxes at the Halley station of the Brunt Ice Shelf. Van den Broeke et al. (2005)  
97 calculated the year-round turbulent fluxes with MOST along a traverse line from coastal  
98 to inland region in Dronning Maud Land, Antarctica. Based on these, we think it is  
99 acceptable to use MOST and the bulk method if we intend to predict the potential mass  
100 and isotope changes that can be caused by atmosphere-snow vapor exchange.

101 When it comes to the quality of model calculations, the key factor is whether the model  
102 has been built using appropriate physical processes and meteorological parameters. If  
103 such a model can accurately reproduce observations at Dome C, it is highly likely that  
104 it will also be able to make predictions for Dome A within some degree of uncertainty.  
105 We hope we can have more observational data from Dome A to constrain the model,  
106 which is on progress but not available currently.

107

### 108 **Detailed comments**

109 **1)** *L20-22: This is misleading because the given values refer to the simulated changes*  
110 *when applying one average summer day. The way it is currently written suggests that*  
111 *the given values correspond to the average daily impact on the isotopes when*  
112 *simulating many different summer days.*

113 **Response:** Thank you for bringing the misleading information to our attention. We have  
114 revised the manuscript by re-simulating the continuous variations for snow isotopes and  
115 water vapor isotopes at the atmosphere-snow interface. Using the new simulated results  
116 obtained from Dome C and Dome A, we have calculated the daily impact of  
117 atmosphere-snow water vapor exchange on water isotopes. This was done by averaging  
118 the hourly values during summer clear-sky, cloudy and winter days. Based on these new  
119 results, we have rewritten the Abstract to reflect our findings accurately.

120

121 **2) L26:** *I disagree with this statement. Although, in contrast to summer, the*  
122 *meteorological variables don't seem to have a diurnal cycle in winter, the simulation of*  
123 *the isotopic changes shows similar magnitudes to the simulated changes in summer.*  
124 *How do you come to the conclusion that there are no relevant isotopic changes*  
125 *simulated on a diurnal scale in winter? Please clarify what this statement refers to. In*  
126 *that context, please reconsider the use of the term "diurnal cycle" or "diurnal pattern"*  
127 *in the manuscript. For me, a diurnal cycle is a repetitive pattern, i.e., similar values are*  
128 *found at the same time of the day. However, the authors use that term when describing*  
129 *the simulated isotopic change within 24 hours (e.g., L26, L295, L296, L310, L314, L319,*  
130 *L328, L330, L335, L339, L353-355, L361, L403, . . . ). But since the simulated isotopic*  
131 *values are different at 00:00 and 24:00 of the simulated day, the isotopes do not show*  
132 *a diurnal cycle but a change during one day.*

133 **Response:** Thanks for pointing out this. Our simulations at Dome A indicate that the  
134 water vapor isotopic composition during winter exhibits similar magnitudes of change  
135 to those observed during summer. However, the variations in snow isotopic  
136 composition during winter are significantly smaller than those observed during summer.  
137 This difference can be attributed to the more pronounced changes in meteorological  
138 conditions and latent heat flux that occur within a 24-hour period during summer days.  
139 As a result, we have revised the Abstract to emphasize the significance of  
140 meteorological conditions on the impact of atmosphere-snow water vapor exchange.  
141 Additionally, we have rephrased the sentences in L26 to provide a more explicit  
142 statement in the revised manuscript.

143 *"According to the model simulations, atmosphere-snow vapor exchange can result in*  
144 *little to no changes water vapor and surface snow water isotopes under winter*  
145 *conditions at Dome A. However, the model predicts that snow  $\delta^{18}\text{O}$  and  $\delta\text{D}$  would be*  
146 *depleted there will be more depletion in snow  $\delta^{18}\text{O}$  and  $\delta\text{D}$  during the 24-hour*  
147 *simulation period in winter, which is opposite to the predictions made under summer*  
148 *conditions."*

149 We also appreciate the feedback regarding the misnomer and have thus replaced  
150 the term "diurnal cycle" or "diurnal pattern" with the more accurate term "diurnal  
151 changes" or "diurnal variations" in the revised manuscript.

152

153 **3) L114-116:** *This sentence lacks clarity, please reformulate it. The calculation of*  
154 *sublimation and deposition is based on the same formula in the model, so why are two*  
155 *different formulations used here? And please change "followed by a mixing procedure*  
156 *and then uptake of surface snow", e.g., to "and the deposit is mixed into the snow*  
157 *surface layer".*

158 **Response:** Thank you for your comment. Previous studies have shown that there are  
159 differences in isotopic fractionation between sublimation and deposition (Ritter et al.,  
160 2016; Hughes et al., 2021). It is important to note that during deposition, the dominant  
161 process is equilibrium fractionation, whereas sublimation is significantly influenced by  
162 kinetic fractionation, except for equilibrium fractionation. Therefore, it is necessary to  
163 use two different formulations to describe the isotopic balance between snow and water

164 vapor in Section 2.2. In case of mass changes in sublimation and deposition, the same  
165 formula as shown in Eq: (1) can be used.

166 However, we agree that the statement mentioned in the comment was confusing,  
167 and we have rewritten it in the revised manuscript as follows:

168 “During sublimation, water vapor is released from snow, transported into the  
169 atmospheric layer via turbulent mixing and molecular diffusion, and immediately  
170 mixed with the water vapor already in the near-surface atmospheric layer. During  
171 deposition, water vapor is influenced by aerodynamic resistance from turbulence and  
172 molecular diffusion, and the deposit is mixed into the snow surface layer.”

173

174 **4) L124:** *What does “mainly” and “etc” refer to? Are further input parameters required*  
175 *to run the model? If so, please provide a complete list of all input parameters. If not,*  
176 *please remove the “etc”.*

177 **Response #4:** Remove, Thanks.

178

179 **5) L129-130:** *Please provide a sufficient discussion of the uncertainty of the calculated*  
180 *latent heat fluxes beyond what is presented in S2 in the supplements. Is there a way to*  
181 *evaluate the quality of the latent heat flux calculations using another dataset (e.g.,*  
182 *measured with an eddy covariance system)?*

183 **Response:** Thanks for your comment. We have made significant updates to the revised  
184 manuscript, particularly regarding the estimation method for the uncertainty of the  
185 latent heat flux calculations. The original Monte Carlo method has been replaced with  
186 a more straightforward approach that involves stacked and averaged simulations over  
187 multiple days. This new method relies on continuous calculations for the latent heat  
188 flux using meteorological input data from individual days. We have provided a detailed  
189 explanation of this new method in the Text S2 of the supplements (details can be seen  
190 in Comment #52), where we also analyze the impact of the uncertainty of the calculated  
191 latent heat fluxes.

192 It is crucial to assess the accuracy of the latent heat flux calculations. However,  
193 there were no available measurements from the eddy covariance system to validate the  
194 calculations at Dome A. Therefore, we had to rely on comparing our calculations with  
195 those in previous publications. Ma Y. et al. (2011) had previously estimated the latent  
196 heat flux at this site. According to their findings, the latent heat flux calculations  
197 exhibited significant cycles on the diurnal scale and its diurnal ranges are  $2.7 \text{ W/M}^2$   
198 during summertime. These features and the order of magnitude for latent heat flux are  
199 consistent with the calculations in our study. Moreover, both the previous studies and  
200 our study found that the diurnal changes in latent heat flux are not significant during  
201 winter days. Based on these similarities, we are confident that the latent heat flux  
202 calculations in our study are reliable.

203

204 **6) L134, Eq 1.:** *The formula that the authors use to calculate the latent heat flux is not*  
205 *correct. Following Berkowicz and Prahm (1982) (B&P82) from solving Eq. 22 for LE,*  
206 *then using H from Eq. 11d with u and  $\Theta^*$  from Eqs. 11a and 11b,  $\Delta u = u_{air} - u_{surface}$*   
207 *with  $u_{surface} = 0$ , and  $\gamma = cp/Ls$  you obtain:*

$$LE = \rho L_s \kappa^2 \cdot \frac{u_{air}}{\log\left(\frac{z_{u,a}}{z_{u,0}}\right) - \Psi_m\left(\frac{z_{u,2}}{L}\right) + \Psi_m\left(\frac{z_{u,1}}{L}\right)} \cdot \frac{q_a - q_s}{R \cdot \log\left(\frac{z_{t,a}}{z_{t,0}}\right) - \Psi_h\left(\frac{z_{t,2}}{L}\right) + \Psi_h\left(\frac{z_{t,1}}{L}\right)} \quad (1)$$

208

209 *Additionally,  $L_s$  should not show up on the right side of the formula when giving the*  
 210 *expression for  $LE/L_s$ . Please correct the theory of the box model calculation and re-run*  
 211 *all simulations of the study. Furthermore, in Eq. 1, in L134 and L138: There is no time*  
 212 *derivative given in B&P82, they use  $\Delta$  to indicate the vertical gradient. When using the*  
 213 *MOST, the latent heat flux depends on the wind speed as well as the vertical humidity*  
 214 *gradient ( $q_a - q_s$ ).*

215 **Response:** We are grateful to the reviewer for this valuable suggestion. Based on this  
 216 feedback, we have made necessary corrections to Eq: (1) in the revised manuscript.  
 217 However, for simplification of calculation, we ignored the corrected parameters in Eq:  
 218 (1) during modeling. Using the revised model, we generated new simulations and the  
 219 updated results are presented in Figures 2-6 of the main text (at the end of this response).  
 220

221 **7) L135:** Please change " $\rho_V$ " to " $\rho_a$ ".

222 **Response:** Thanks, correct.

223

224 **8) L145:** Where does the chosen value of 0.244 mm for the roughness length come from?  
 225 The latent heat flux is highly sensitive to the choice of the roughness length. Please  
 226 provide a sensitivity analysis of the simulated results to the choice of a range of  
 227 roughness lengths, e.g., 0.1 mm to 2 mm.

228 **Response:** The roughness length ( $z_0$ ) at Dome A was calculated in this study using the  
 229 least square method and wind observations at three levels (1 m, 2 m, and 4 m) under  
 230 neutral conditions, which typically vary between  $10^{-5}$  to  $10^{-3}$  m. To simplify the  
 231 calculations, a constant value of  $z_0 = 2.44 \times 10^{-4}$  m was used in the modeling. This  
 232 estimate was determined using all wind speed data (397 groups) under neutral  
 233 conditions. It is worth noting that  $z_0$  in this study is close to the previous calculation of  
 234  $1.45 \times 10^{-4}$  m from Ma et al., (2011).

235 We acknowledge the importance of  $z_0$  value in obtaining accurate results. In  
 236 response to the reviewer's suggestion, we have added a sensitivity test for  $z_0$  in the  
 237 supplementary section (Text S3). Additionally, we have provided detailed explanations  
 238 and cautions for  $z_0$  calculations in the main text.

239 The added text S3 is shown as follows:

240 "Besides the initial parameters, changes in  $z_0$  and snow density might influence  
 241 the isotopic effects of atmosphere-snow water vapor exchange. Thus, we conducted two  
 242 other groups of comparative experiments the sensitivity test and run for a 24-h period  
 243 under summer clear-sky conditions at Dome A. The first was focused on the sensitivity  
 244 of surface and water vapor  $\delta^{18}\text{O}$  to varying  $z_0$  between 0.1 to 2 mm. The second  
 245 experiment aimed to investigate the isotopic effects of snow-air vapor exchange in  
 246 response to different snow density (300-400 kg/m<sup>3</sup>). All other simulation settings were  
 247 the same as in Section 2.2.4 of the main text.

248 The results of sensitivity tests for  $z_0$  and snow density are shown in Fig. S1. As  
 249 shown in the figure, the magnitude of the diurnal variations in water vapor  $\delta^{18}\text{O}$  ( $\delta^{18}\text{O}_v$ )

250 is very sensitive to  $z_0$  but not to snow density (Fig. S1) given that  $z_0$  determines the  
251 calculations of latent heat flux. This is consistent with Ritter et al. (2016) who pointed  
252 out that diurnal variations in water vapor isotopic composition decrease with the  
253 increase of mixing layer height. In contrast, the magnitude of diurnal variations in snow  
254  $\delta^{18}\text{O}$  ( $\delta^{18}\text{O}_s$ ) is more sensitive to snow density (Fig. S1).

255

256 **9)** L172: Above (in L138),  $RH_i$  is defined as the relative humidity over ice, not for the  
257 specific humidity.

258 **Response:** Thanks, correct.

259

260 **10)** L182, L183: The “ $h$ ” in Merlivat and Jouzel (1979) (M&J79) does not refer to the  
261 relative humidity of the air, but to the relative humidity of the air with respect to the  
262 surface temperature, i.e.,  $h = q_{air} q_{sat,surface}$  (instead of  $RH_{air} = q_{air} q_{sat,air}$ ). The  
263 formulation in M&J79 is really confusing, but their  $q_s$  in the formula of  $h = q/q_s$  (below  
264 Eq. 9 in M&J79), in fact, refers to the “saturated specific humidity at the air-water  
265 interface ( $z=0$ )”, i.e., the saturation specific humidity with respect to the surface  
266 temperature, while  $q$  is the air specific humidity. It is, thus, not correct to use the relative  
267 humidity here, but instead  $h = q_{air} q_{s,surface}$ . If this was not the case in the simulations,  
268 please correct and re-run them. Otherwise, please be more precise in the description of  
269  $RH_i$ .

270 **Response:** Thanks for the valuable feedback provided by the reviewer regarding the  
271 term 'humidity'. We have carefully reviewed our equations and made the necessary  
272 corrections based on the definition provided in Merlivat and Jouzel (1979). The revised  
273 equations have been used to generate new simulated results. Furthermore, we have  
274 improved the clarity of the description of  $RH_i$  in the supplementary material. For more  
275 information on the corrections made, please kindly refer to our response to Comment #  
276 51.

277

278 **11)** L450 and 454. The authors state that the air temperature is controlling the isotopic  
279 fraction. This is not correct. It is the snow surface temperature, which is governing the  
280 isotopic fractionation. L189: Where does the expression for  $R_t EX$  come from? Because  
281 Eq. 2 in Jouzel and Merlivat (1984) is  $R_t EX = \alpha_f (R_{tv} + 1) - 1$ . Please correct this

282 **Response:** Thanks for pointing out these mistakes. The necessary corrections have been  
283 done in the revised manuscript, including revising the Eq: (13) and updating L450 and  
284 L454.

$$285 \quad R_{EX}^f = \alpha_f (R_v^f + 1) - 1 \quad (13)$$

286

287 **12)** L200-201: Casado et al. (2016) does not present a snow dataset. If the authors refer  
288 to the Touzeau et al. (2016) dataset, please add the reference.

289 **Response:** Thanks, we have added the reference.

290

291 **13)** L209: I suggest replacing “representative” with “average”. It was initially unclear  
292 to me what the authors meant by “stacking” the observed cycles.

293 **Response:** We agree. The “representative” has been replaced by “average” in the  
 294 revised manuscript.

295

296 **14) L210:** Please remove the “e.g.” and “etc.” in the parenthesis since the given  
 297 parameters are the only ones that can be downloaded from the CALVA program.

298 **Response:** Thanks, delete.

299

300 **15) L211-216:** Is there no surface temperature record available for DOME-C? And if  
 301 not, why is the surface temperature calculated from ERA-5 model long wave data  
 302 instead of using the ERA-5 model output of the surface temperature?

303 **Response:** During the modelled period, surface temperature data were available for  
 304 Dome C, as measured by a Campbell Scientific IR120 infrared probe and reported by  
 305 Casado et al. (2016). In the revised manuscript, we used these observations as input for  
 306 simulations at Dome C instead of the calculations based on the method from Brun et al.  
 307 (2011).

308 However, for Dome A, surface temperature observations were not available from  
 309 2005 to 2011. Therefore, we used the method from Brun et al. (2011) to calculate  
 310 surface temperature (Eq: (17) in the main text). We chose this method because it can  
 311 accurately represent the observations at Dome C. To validate the calculations at Dome  
 312 A, we compared them with observed 10cm firm temperature at the same location. The  
 313 calculations matched well with the observed snow temperature for the top 10cm layer,  
 314 as shown in Figure 2a.

$$315 \quad T_s = \left( \frac{LW_{up} + (\epsilon - 1)LW_{dn}}{\epsilon\sigma} \right)^{0.25} \quad (17)+$$

316 Furthermore, the direct output of surface temperature from the ERA-5 model can  
 317 also be used as input for our model because the ERA-5 model output at Dome C is  
 318 comparable to the surface temperature calculations based on the method used in this  
 319 study, as well as the long-wave radiation data from the ERA-5 reanalysis data (Figure  
 320 2b).

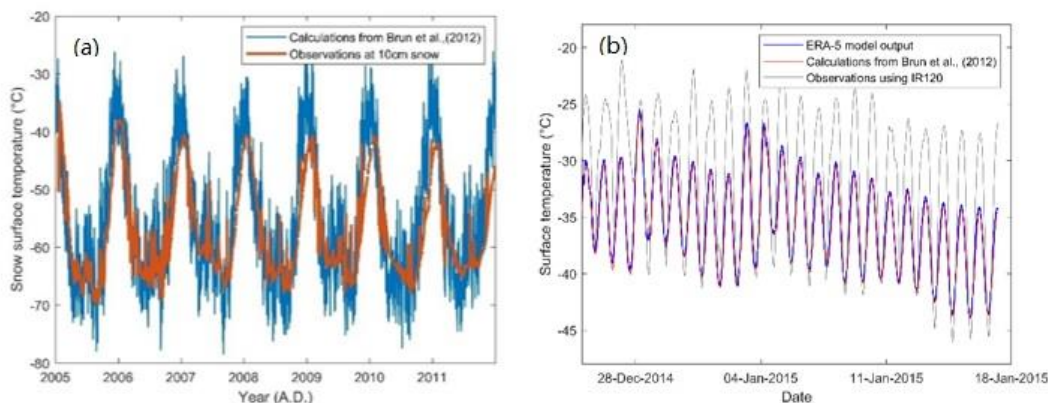

321

322 **Figure 2.** The comparison of the  $T_s$  results of different methods. (a) The calculated  $T_s$   
 323 and the observed snow temperature for top 10 cm snow at Dome A, during the period  
 324 of 2005-2011 (b) The calculated  $T_s$ , the ERA-5 model output of  $T_s$  and the observed  $T_s$   
 325 at Dome C, during the period of 5<sup>th</sup>-16<sup>th</sup> January, 2015



326

327 **16) L214:** *An emissivity of 0.93 seems relatively low to me. Please indicate where this*  
328 *value originates from.*

329 **Response:** Thanks for this comment. The value of 0.93 for snow emissivity was cited  
330 from the Doctoral thesis of Ma et al. (2012), which calculated the surface snow  
331 temperature at Dome A. This value is lower than the snow emissivity of 0.99 at Dome  
332 C (Brun et al., 2011; Vignon et al., 2017). Despite the significant difference between  
333 these two values, we still use the value of 0.93 as the snow emissivity for Dome A  
334 simulations. We have now included this difference between Dome A and Dome C in  
335 the revised Table S1.

336

337 **17) L216-217:** *The latent heat flux is calculated based on the averaged meteorological*  
338 *parameters. In my view, it makes more sense to calculate the latent heat flux based on*  
339 *the hourly data and (if needed) stack and average it afterward.*

340 **Response:** We concur that the fluctuations in latent heat flux over a period of multiple  
341 days are significant for subsequent simulations related to water isotopes. To that end,  
342 we recalculated the latent heat flux and then computed the average, which is illustrated  
343 in Figure 2 of the primary text (please see the revised version at the end of this response).

344

345 **18) L217:** *Please remove the “etc.” if no further data is used.*

346 **Response:** Thanks, remove.

347

348 **19) L220:** *An average snow density from 2m+ deep snow pits might not be appropriate*  
349 *for the top 1.5 cm. Please provide a sensitivity analysis of the simulation using a range*  
350 *of realistic surface snow densities.*

351 **Response:** Thanks for the suggestion. We will test the isotopic values in response to  
352 varying snow density at Dome A and add results to supplementary (Text S3).

353

354 **20) L234:** *What does “to fully assess the accumulated isotope effects of atmosphere-*  
355 *snow water vapor exchange.” mean? Please rewrite this sentence to clarify on this.*

356 **Response:** In order to illustrate the impact of cloud presence on the simulation results  
357 at Dome A, we have conducted two simulated cases: one with cloud and one without  
358 cloud. However, we understand that the original sentence in L234 may have been  
359 unclear. Therefore, we have completely rewritten the sentence as follows:

360 “Therefore, in the model simulations for Dome A, we simulated two representative  
361 cases with and without cloud (i.e., cloudy vs. clear-sky conditions) in order to  
362 accurately assess the isotopic variations associated with atmosphere-snow water vapor  
363 exchange.”

364

365 **21) L250-251:** *I hardly see any diurnal cycle in the wind speed. In addition, I would*  
366 *argue that the diurnal cycle of the LE differs from the diurnal cycles of Ts and q, since*  
367 *it has a local minimum at 07:00UTC.*

368 **Response:** Thanks for providing a different perspective, as suggested by the reviewer.  
369 The wind has a diurnal cycle under clear-sky conditions at Dome A. However, due to

370 the large range of the y-axis in Figure 2a of main text, the significant pattern for wind  
371 was unclear. We have made necessary corrections to Figure 2 of main text to improve  
372 its clarity.

373 Regarding LE, we recalculated it following the reviewer's suggestion. The results  
374 show that high LE values are observed during the warming phase, and lower values  
375 during the cooling phase, similar to  $T_s$  and  $q$  as depicted in Figure 2 of the main text (at  
376 the end of this response). We acknowledge that the original manuscript may have had  
377 unclear sentences or descriptions for LE changes. We have revised the manuscript by  
378 rewriting the sentences to make it more precise and clear in expressing our viewpoint.  
379

380 **22)** *The argument that the use of Pang et al. 2019 is a reliable approach is a circular*  
381 *argument since you are using the estimate of Pang et al. 2019 to compare with the data*  
382 *that Pang et al uses to create the relationship between isotope and temperature.*

383 **Response:** Thanks for this comment. To support our estimate, we used simulation data  
384 from ECHAM5-wiso (Werner et al., 2011), which calculated precipitation isotopes  
385 based on temperature and other factors. We compared the results of our calculation with  
386 the simulation data, and the comparison is presented in Figure 2. As shown in the figure,  
387 the two methods agree with each other quite well.

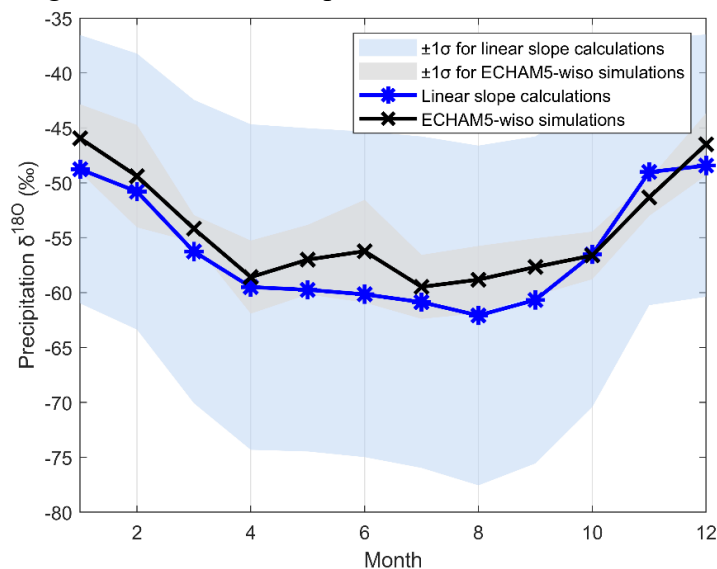

388 **Figure 3.** The estimated precipitation  $\delta^{18}\text{O}$  and its standard deviation during the period  
389 of 2005-2011. Blue solid line with star marks represents the calculations using the  
390 temperature-isotope slope, and the light blue shaded area is the uncertainties. Black  
391 solid line with x marks and light grey shaded area displays the ECHAM5-wiso  
392 simulation data and its uncertainties, respectively.  
393

394 **23)** *L251, L266: It is not correct to say that the meteorological data are less variable*  
395 *in winter. In fact, all meteorological variables are similarly variable as they have about*  
396 *the same standard deviation. Maybe reformulate to “none of the meteorological*  
397 *variables shows a diurnal cycle” or “in the winter data does not show a diurnal signal.”*

398 **Response:** We appreciate your valuable suggestion. The sentences mentioned in the  
399 comment have been revised in the new version of the manuscript.  
400

401

402 **24) L260:** *Please give the value of the used snow density. How does this value compare*  
403 *to the density taken from Laepple et al. (2018) for the DOME-C simulations?*

404 **Response:** In Table 1 of main text, we have listed the snow density values at Dome A  
405 and Dome C. The snow density value at Dome A ( $380 \text{ kg/m}^3$ ) is slightly higher than  
406 that at Dome C ( $350 \text{ kg/m}^3$ ).

407

408 **25) L265-266:** *How is winter defined? Are all hourly data from June-August used?*

409 **Response:** Yes, the winter period corresponds to June-August in Antarctica. During the  
410 winter period in Antarctica, hourly meteorological data from clear-sky days were  
411 retrieved and then averaged for running simulations at Dome A.

412

413 **26) L272:** *Please provide the value of the used  $\delta$ -T slope in the text.*

414 **Response:** For non-summer seasons, the isotopes of precipitation were also estimated  
415 using the regression line (slope of  $0.64 \pm 0.02$ ,  $R^2=0.59$ ) of the non-summer precipitation  
416 isotopic composition and near surface air temperature at Dome F, Vostok and Dome C  
417 compiled by Pang et al. (2019). In the main text, we added the used  $\delta$ -T slope following  
418 the comment.

419

420 **27) L273-274:** *Where is this comparison presented, and why is this relevant here? Did*  
421 *this comparison influence the initial values of  $\delta^{18}\text{O}_s$ ? If not, I suggest to remove this.*

422 **Response:** We appreciate this suggestion. We used a comparison of  $\delta^{18}\text{O}_s$  values  
423 between the ECWMF-wiso dataset and linear calculations using the  $\delta$ -T slope to  
424 validate the  $\delta^{18}\text{O}_s$  estimation. The results of this comparison are presented in Figure 3.  
425 We observed a strong correlation between the monthly  $\delta^{18}\text{O}_s$  variations in these two  
426 data sources, and their values were similar in each month, indicating that the linear  
427 calculations are reliable. Based on this finding, we can confidently state in the main text  
428 that the setting of  $\delta^{18}\text{O}_s$  values are accurate at Dome A. Thus, it is necessary to mention  
429 the comparison between  $\delta^{18}\text{O}_s$  calculations from the  $\delta$ -T slope and the ECWMF-wiso  
430 dataset in the text.

431

432 **28) L277:** *Please add the reference (Ma et al., 2020) behind "measurements" again*

433 **Response:** Thanks for reminding this. We have checked and added the reference.

434

435 **29) L292:** *Please clarify: What does the "disequilibrium was included" mean?*

436 **Response:** The term "disequilibrium" in the original manuscript refers to the isotopic  
437 composition of water vapor being in thermodynamic imbalance with the snow isotopes  
438 at the snow-atmosphere interface. During modeling, we assumed that the isotopic  
439 composition of water vapor was in equilibrium with the snow isotopes under the initial  
440 conditions. However, published observations from other polar sites indicate that  
441 "disequilibrium" conditions are common. To test how "disequilibrium" conditions  
442 affect simulations of water vapor isotopic composition and snow isotopes, we designed  
443 sensitivity experiments. In the section 2.4 of main text, we used the phrase  
444 "disequilibrium was included" to accurately describe the case. However, this

445 description may not be clear to readers. In the revised manuscript, we replaced it with  
446 "the isotopic composition of water vapor being in thermodynamic imbalance with the  
447 snow isotopes was included" to make it easier to understand.

448

449 **30)** *L300-301: The authors mention snow samples for Dome-C in L200-201. An*  
450 *evaluation of the snow isotopic composition development to observations would be very*  
451 *beneficial for the analysis. The simulated changes in snow isotopic composition seem*  
452 *very small compared to variations observed in surface snow samples.*

453 **Response:** We acknowledge that the simulated changes in the isotopic composition of  
454 snow do not match well with the observations at Dome C. This error can be attributed  
455 to the absence of certain physical mechanisms in the original model. To address this  
456 issue, we utilized an updated model, which is mentioned in Figure 1, to re-run  
457 simulations during the Jan 5<sup>th</sup> -16<sup>th</sup>, 2015 at Dome C. As depicted in Figure 3 of the  
458 main text (see details at end of this response), the averaged magnitude of the simulated  
459 snow isotopic variations aligns with the stacked observations within 24 hours.

460

461 **31)** *L314-315: It is not correct to say diurnal cycle here, instead, Fig. 4 shows the*  
462 *simulated change isotopic composition within 24 hours when applying an average*  
463 *summer day observed in January 5-12th.*

464 **Response:** Thanks, we corrected the L314-315 following the reviewer's suggestion.  
465 The details are as follows:

466 "The modelled snow  $\delta^{18}\text{O}$ ,  $\delta\text{D}$  and d-excess also follow a diurnal pattern where higher  
467 values occur during the warming phase and lower values during the cooling phase.  
468 However, the magnitude of their diurnal variations is smaller than that of water vapor  
469 isotopic compositions (see Figs. 3a-3c)"

470

471 **32)** *L319: What does "diurnal variations" mean? Diurnal maximum minus diurnal*  
472 *minimum? Please define. Maybe the term "diurnal range" is more suitable?*

473 **Response:** Thanks for this helpful suggestion. The "diurnal variations" in this sentence  
474 means the diurnal maximum minus diurnal minimum. To make it more clear, we used  
475 the "diurnal range" to replace the "diurnal variations".

476

477 **33)** *L339: As mentioned above, the changes in isotopic composition in winter are*  
478 *comparable to the ones in summer.*

479 **Response:** Thanks for the comment. We have revised this sentence as follows:

480 "As a result, compared to the simulated results in summer, there is no diurnal cycles in  
481 snow isotopes in winter, but the changes in water vapor isotopic composition in winter  
482 are comparable to the ones in summer."

483

484 **34)** *L354-355: I cannot confirm this statement based on the figures. The different axis*  
485 *ranges make it difficult to compare.*

486 **Response:** In Figure 7 of the original manuscript, we used the red lines to show the  
487 sensitivity of simulated results to changes in initial conditions. From Figure 7e and  
488 Figure 7f (the picture shown as below), the  $\delta^{18}\text{O}_v$  changes are more significant than the

489  $\delta^{18}\text{O}_s$ , suggesting that the  $\delta^{18}\text{O}_v$  are more sensitive.

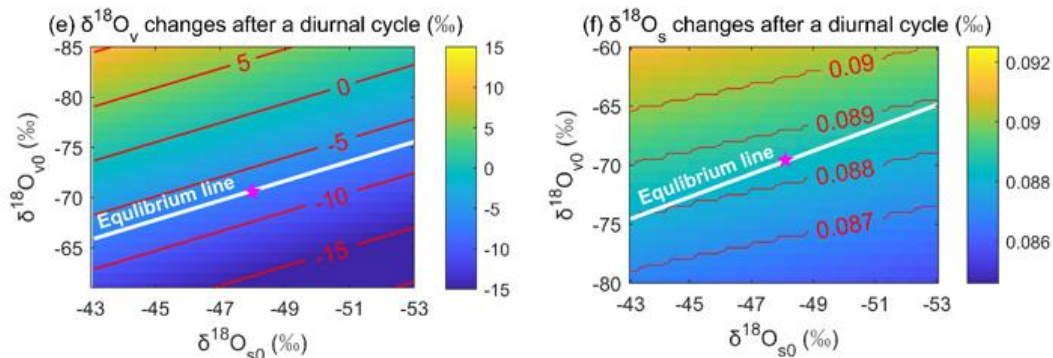

490

491 **Figure 4.** Sensitivity of the modeled results to changes in  $\delta^{18}\text{O}_{v0}$  and  $\delta^{18}\text{O}_{s0}$  (citing  
492 from the original manuscript)

493

494 **35) L359:** Please discuss how the simulated results compare to other similar modeling  
495 studies, e.g., Wahl et al. (2022) (for Greenland) and Ritter et al. (2016)?

496 **Response:** Thank you for your helpful comment. We have revised the manuscript to  
497 include a discussion of the similarities and differences between our calculations and the  
498 simulated results of other studies. One significant similarity we found with two similar  
499 studies you mentioned is that diurnal variations in snow isotopes and water vapor  
500 isotopic composition in the boundary layer can be mainly explained by the atmosphere-  
501 snow water vapor exchange through modeling results. Additionally, these studies  
502 suggest that the accumulation of isotopic effects from the atmosphere-snow water vapor  
503 exchange can lead to isotopic enrichment of the snow layer during the summer, if the  
504 snow layer remains consistently exposed at the surface. One main difference we noticed  
505 between these studies is the magnitude of diurnal changes in water vapor isotopic  
506 composition and snow isotopes. For instance, the diurnal range of snow isotopic  
507 composition at Dome C is larger than that at Kohnen station and Dome A, which can  
508 be attributed to the stronger variability of humidity gradient and wind speed at Dome  
509 C. We have added these comparisons and related discussions to the main text's  
510 Discussion section.

511 The detailed comparison in the main text is shown as follows:

512 “The spatial difference appears in the diurnal amplitude of water vapor  $\delta D$  across East  
513 Antarctic interior region. The modeled value of 33.03‰ at Dome A is slightly less than  
514 the averaged observations of  $36 \pm 6$ ‰ at Kohnen station and the in-situ measurements  
515 of  $38 \pm 2$ ‰ at Dome C (Ritter et al., 2016; Casado et al., 2016). The difference between  
516 the two latter locations can be explained by a smaller amplitude of diurnal temperature  
517 cycle (8.7 °C) at Kohnen station, relative to that in Dome C (11.1 °C). However, there  
518 still exists a discrepancy in water vapor  $\delta D$  amplitude when the peak-valley gap of  
519 diurnal temperature cycle is the same at Dome A and Dome C. Such an anomaly pattern  
520 can be attributed to atmospheric dynamical conditions linked with wind speed. At  
521 Dome A, the daily mean wind speed of 2.8 m/s is lower than 3.3 m/s in Dome C and  
522 4.5 m/s in Kohnen station during summer. A small wind speed corresponds to the  
523 relatively weak air convection in horizontal orientation. Due to the coupling between

524 upper and lower atmospheric layer, vertical turbulent mixing may decrease with the  
 525 weakened air convection in the atmospheric near-surface layer (Casado et al., 2018).  
 526 This change can attenuate molecular exchange between surface snow and water vapor.  
 527 In parallel, the decrease of vertical turbulence may result in a less efficient turbulent  
 528 diffusion of water molecules and an elevated contribution of molecular diffusion during  
 529 air-snow exchange. Changes in water vapor diffusion pathways increase kinetic  
 530 fractionation and reduce effective isotopic fractionation of water isotopes, leading to a  
 531 muted fluctuation of modelling water vapor  $\delta D$  in combination with less mass exchange.  
 532 The surface snow  $\delta D$  displays the synchronization change and different amplitude in  
 533 diurnal cycles, in accordance with the comparisons of water vapor  $\delta D$  between Dome  
 534 A and Kohnen Station. The similar trend of snow  $\delta D$  is originated from similar  
 535 temperature variations on a diurnal scale, because surface snow isotopic composition is  
 536 mainly influenced by temperature-controlled fractionation of water isotopes during air-  
 537 snow vapor exchange. This relationship also suggests that the difference in temperature  
 538 amplitude could be playing a role in the unequal amplitude of snow  $\delta D$ ”.

539

540 **36) L356-358:** *This basically means that the simulated snow isotopic composition does*  
 541 *not significantly change after 24 hours of simulation? How much does it change when*  
 542 *letting the simulation run longer?*

543 **Response:** Thanks for this constructive suggestion. We have conducted simulations for  
 544 Dome A over the course of one week during summer, using the updated model. We  
 545 observed that the isotopic composition of snow became more enriched compared to its  
 546 initial state (Figure 5).

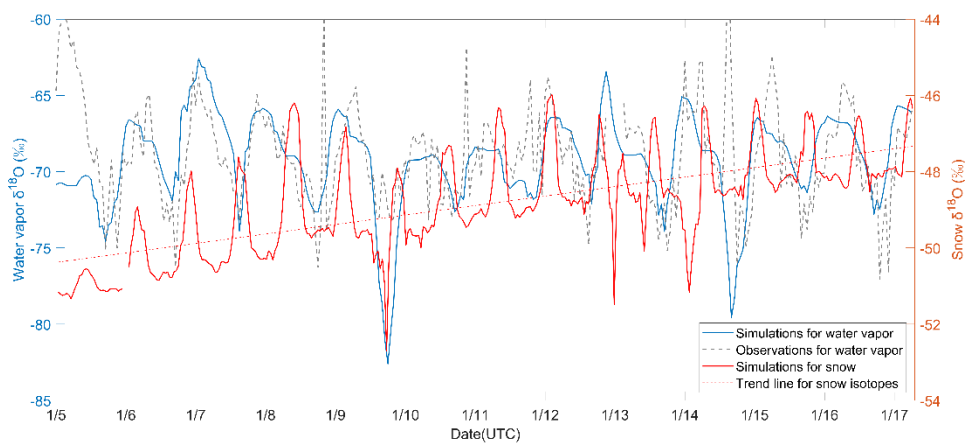

547

548 **Figure 5:** The changes in snow and water vapor isotopes in 11-day at Dome C  
 549 simulations

550

551 **37) L364-366:** *Please reformulate this sentence more clearly.*

552 **Response:** Thanks for this suggestion. We reformulated this sentence as following:  
 553 *“Sublimates mix with water vapor, leading to an increase in vapor  $\delta^{18}O$  and  $\delta D$ . This*  
 554 *happens because sublimates have higher  $\delta^{18}O$  and  $\delta D$  than atmospheric water vapor*  
 555 *given the initial conditions (i.e., surface snow also have high  $\delta^{18}O$  and  $\delta D$ )”.*

556

557 **38)** L369-370: *How is this evident? The authors do not provide evidence for what drives*  
558 *the isotopic composition, neither within their 24-hour simulation nor in a more realistic*  
559 *simulation of a longer time period. The latent heat flux is driven by (1) the near-surface*  
560 *humidity gradient (which, of course, is closely related to the near-surface temperature*  
561 *gradient) and (2) the wind speed. However, this study lacks any evidence that the*  
562 *temperature and humidity drive the surface snow isotopic composition. Please remove*  
563 *this statement.*

564 **Response:** Thanks for this suggestion. We acknowledge that original manuscript did  
565 not accurately reflect the relationship between temperature, humidity, and water vapor  
566 isotopic composition. After calculating the latent heat flux, we agree that the water  
567 vapor and snow isotopic composition are likely controlled by the near-surface humidity  
568 gradient and wind speed. We have revised this statement to reflect the discussion after  
569 this sentence, rather than deleting it. The new statement is as follows:

570 "Based on Fig. 2, 4c, and 5c, it is clear that the diurnal isotope cycles in surface snow  
571 and vapor water have a strong correlation with temperature and humidity."

572

573 **39)** L371-372: *The authors suggest that wind speed doesn't seem to affect the isotopic*  
574 *composition of the surface snow. However, I'd like to point out that they're using an*  
575 *average wind speed over 11 days, which doesn't show the hourly changes. Thus, such*  
576 *simulation does not allow for a statement that wind speed does not drive the snow*  
577 *isotopic composition at Dome-C. For example, let's say, just to make my point, that 90%*  
578 *of the changes in snow type are due to wind speed. If the wind speed increases linearly*  
579 *from 2 to 7 m/s over the first 5.5 days and then decreases from 7 to 2 m/s in the next 5.5*  
580 *days, the snow isotopes would change mainly driven by the wind speed. However, the*  
581 *daily average of this wind change would always be 4.5 m/s for all 24 hours. So, when*  
582 *they use the daily average wind speed in their simulation, it makes it seem like wind*  
583 *has no effect on the snow isotopic composition, even though in this example, wind was*  
584 *defined to be the main factor driving the isotopic changes.*

585 **Response:** We completely agree with the reviewer's viewpoint. The original  
586 simulations, which used averaged meteorological conditions over a 24-hour period,  
587 failed to accurately reflect the impact of wind on the water vapor and snow isotopic  
588 composition at the atmosphere-snow interface. To address this issue, we re-ran the  
589 simulations to obtain continuous isotopic variations during the studied period.

590 Furthermore, we conducted a sensitivity test by varying with a significant diurnal  
591 cycle of wind and comparing it with the ones with averaged wind speed. The results, as  
592 shown in Figure 6, suggest that strong variability in wind speed will enlarge the  
593 variations in latent heat, leading to a more significant diurnal change in water vapor  
594 isotopes and snow isotopes.

595

596 **40)** L386: *What does this mean: "This could adversely affect changes in atmospheric*  
597 *dynamical conditions between day and night"? Please clarify*

598 **Response:** The statement in this comment suggests that smaller temperature changes  
599 within a cloudy day can create relatively stable atmospheric dynamical conditions. As  
600 a result, the diurnal variations of latent heat flux in summer cloudy days are less

601 significant than those in summer clear-sky days. This leads to less mass exchange as  
602 well as isotope effects during atmosphere-snow water vapor exchanges. To make the  
603 statement clearer, we have reformulated it as follows:

604 *“With the presence of cloud, the differences between the air temperature and surface*  
605 *temperature during the day and night become less pronounced (as shown in Fig. 2).*  
606 *This could have a negative impact on the changes in atmospheric dynamics between*  
607 *day and night, as evidenced by the relatively small magnitude of diurnal variations in*  
608 *Richardson number (as shown in Figs. 4a and 5a).”*

609

610 **41) L387-389:** *The authors cannot state that: There is no diurnal cycle when averaging,*  
611 *but of course, the wind speed varies on an hourly and daily basis, and the standard*  
612 *deviation is not zero.*

613 **Response:** Thanks for pointing out this inappropriate statement. After careful  
614 consideration, we have decided to remove it as this sentence does not contribute to the  
615 following discussion.

616

617 **42) L427-429:** *Again, the simulated change in the isotopic composition of the vapor is*  
618 *of a comparable magnitude as the changes in summer. What do the authors base this*  
619 *statement on?*

620 **Response:** It is unclear for the statement in the L427-429 of the original manuscript.  
621 We have revised it based on the response to Comment #33.

622 “The results indicate there is small diurnal changes for snow isotopes over the 24-hour  
623 simulation period”.

624

625 **43) L444-446:** *The CALVA program states a sentence on its website on how to*  
626 *acknowledge them for the dataset correctly.*

627 **Response:** Thanks for reminding this. We will use the standard way to express the  
628 acknowledgement for the CALVA program in the revised manuscript.

629 “We also acknowledge using data from the CALVA project and CENECLAM and  
630 GLACIOCLIM observatories (<http://www-lgge.ujf-grenoble.fr/~christo/calva/>)”

631

632 **44) References:** *The two given references for Ma et al. (2020) can currently not be*  
633 *distinguished in the text.*

634 **Response:** Thanks for the comment. We would like to clarify that the two papers  
635 referenced are published by Ma Bin et al. (2020) and Ma Tianming et al. (2020),  
636 respectively. To avoid confusion, we have used the formulation "Ma B. et al. (2020)"  
637 and "Ma T. et al. (2020)" when citing these two studies in the text.

638

639 **45) Figure 2b:** *Why is the standard deviation of the latent heat flux so low for cloudy*  
640 *conditions?*

641 **Response:** Under cloudy conditions, the relatively low values in the standard deviation  
642 of the latent heat flux is mainly attributed to the calculated method (Monte-Carlo  
643 method). In the revised manuscript, we directly estimated the standard deviation by  
644 stacking the simulated diurnal variations of the latent heat flux at the given days. The



645 corrected results can be seen in the Figure 2b of the revised manuscript.

646

647 **46) Figure 3: What is  $\sigma$  for the simulations? Is it the calculated range from the Monte**  
648 **Carlo simulations, or is it the standard deviation of the Monte Carlo simulations?**

649 **Response:** The  $\sigma$  in Figure 3 represents the standard deviation of the Monte Carlo  
650 simulations. According to the reviewers, the estimates for uncertainty provided in the  
651 original manuscript is inappropriate. In the revised manuscript, we have directly  
652 estimated the standard deviation by stacking the simulated diurnal variations of snow  
653 and water vapor isotopic composition in the individual days. The details can be seen in  
654 the Text S2 of the supplemental information (response to Comment #52) and Figure 3  
655 of the main text (at the end of this response).

656

657 **47) Figure 3 caption: Add water “vapor” isotopic composition.**

658 **Response:** Thanks, Correct.

659

660 **48) Figure 4: Again, please be more precise on what “uncertainty” means.**

661 **Response:** We have given a detailed explanation in the Comment #46. Please see the  
662 response to that comment.

663

664 **49) Figure 7: Please provide an explanation of the red lines.**

665 **Response:** The red lines in Figure 7 represent the modeled magnitudes of  $\delta^{18}\text{O}$  diurnal  
666 variations in water vapor and snow with the changes in initial conditions. While they in  
667 fact show the same meanings as the color bar in each panel, but can give a clear and  
668 exact view of sensitivity test results. Thus, we still hold these red lines in the revised  
669 manuscript, but we added an explanation in the figure title.

670

671 **50) Figure 7 caption: Change “6c and 6d” to “7c and 7d”.**

672 **Response:** Thanks, Correct.

673

674 **51) Supplement material S1: The description of the post-processing of the relative**  
675 **humidity (RH<sub>w</sub> to RH<sub>i</sub>) is very difficult to understand. – L51-52: Why do you normalize**  
676 **RH<sub>w</sub>? – L52: Which surface temperature is used? The calculated T<sub>s</sub> based on ERA-5?**  
677 **If so, please discuss the introduced error by normalizing the observations using model**  
678 **data. – L54: (Eq. 15): Do you refer to Eq. 13? – L60: What is an “ideal maximum”? –**  
679 **L60, L61: What do you mean by “each temperature point”? – L63-64: The description**  
680 **of the factor is incomplete (the ratio of  $e_s$  with respect to water to  $e_s$  with respect to ice.**  
681 **Moreover, why do you only apply this factor for super-saturated conditions? The**  
682 **relative humidity should be corrected with respect to ice for sub-saturation as well. –**  
683 **L64: What do you mean by “the rising amplitude of the temperature”?**

684 **Response:** We appreciate a lot for the reviewer#2’s careful checking and valuable  
685 comments for Supplement material S1. This part has been rewritten as follows:

686 “The raw data of relative humidity (RH) at height z is the relative humidity with  
687 respect to the water surface (RH<sub>w</sub>), measured with the HMP35D humidity probe (Xiao  
688 et al., 2008; Ding et al., 2022). The RH<sub>w</sub> can be expressed as a percentage:

689 
$$\underline{RH_w = e_w / e_w^s \times 100\%} \quad (S2)$$

690 where  $e_w$  is the water vapor pressure of air (Pa), and  $e_w^s$  is the saturated vapor pressure  
 691 with respect to the water surface at the air temperature (Pa) which can be calculated  
 692 using the Clausius-Clapeyron equation. When calculating the effective fractionation  
 693 factor ( $\alpha_f$ ) in the model (Eq: (15) in the main text), the  $RH_w$  were converted to the  
 694 relative humidity over ice at the temperature of the air ( $RH_i$ ). The conversion between  
 695  $RH_i$  and  $RH_w$  was proposed based on the calibration procedures of Anderson et al.  
 696 (1984). The details are as follows: 1) The  $RH_w$  observations were firstly rescaled using  
 697 the maximum  $RH_w$  of all measured values at each air temperature point ( $T_a$ ),

698 
$$\underline{RH_w' = RH_w(T_a) / RH_w^{max}(T_a)} \quad (S3)$$

699 2)  $RH_w'$  values were then converted to  $RH_i$  using Eq: (S4) :

700 
$$\underline{RH_i = (e_w^s(T_a) / e_i^s(T_a)) \times RH_w'} \quad (S4)$$

701 where  $e_i^s$  represents the saturated vapor pressure with respect to ice at the air  
 702 temperature (Pa). Like  $e_w^s$ ,  $e_i^s$  was calculated by the Clausius-Clapeyron equation.  
 703 Based on Eq: (S3) and Eq: (S4), we obtained  $RH_i$  as the final result.

704 In addition, the relative humidity of the air with respect to the surface temperature  
 705 (h) in Eq: (14) can also be converted from  $RH_w$  observations. The first step of  
 706 procedures for h conversion is the rescaling  $RH_w$  based on Eq: (S3), same to the  $RH_i$   
 707 conversion. The second step is h calculation using the saturated vapor pressure with  
 708 respect to ice at the surface temperature (Eq: (S5)).

709 
$$\underline{h = (e_w^s(T_a) / e_i^s(T_s)) \times RH_w'} \quad (S5)''$$

710

711 **52) Supplement material S2: The description of the uncertainty estimate/error**  
 712 **propagation is partly unclear and could be improved. Furthermore, the simulation**  
 713 **uncertainties are not sufficiently mentioned and discussed in the main manuscript. A**  
 714 **Figure in S2 that shows the calculated uncertainties for all variables could be helpful.**  
 715 **– L70: How are the "uncertainties" calculated? Is it the standard deviation? – L72:**  
 716 **Which are "those days"? – L75: Which error the standard deviation is applied? Please**  
 717 **provide more details.**

718 **Response:** We would like to express our gratitude to the reviewer for reviewing the  
 719 supplement material S2. The term "uncertainties" in our study represents the standard  
 720 deviation of each variable. We have estimated them directly by stacking the  
 721 observations and calculations on the given days in the revised manuscript. The  
 722 corrections have thus been made in the supplementary document as we have updated  
 723 our method of estimating uncertainties. The revised Text S2 is as follows:

724 "At each time step, we first calculated the standard deviation as the uncertainties  
 725 ( $1\sigma$ ) of wind speed, air temperature, relative humidity by stacking the hourly  
 726 observations from AWS on the selected days for each parameter. The same method was

727 then applied to determine the uncertainty of surface temperature using hourly  
 728 calculations from Brun et al., (2012). We also used the stacking method to estimate the  
 729 uncertainties of other calculations such as the latent heat flux. These estimated  
 730 uncertainties (shaded areas) were plotted in Figures 2 of the main text)

731 The standard deviation of isotopic values were calculated as the uncertainties at  
 732 Dome C. This was also done by stacking the continuous simulations for water isotopes  
 733 over the period studied, from 5th January to 16th January in 2015. However,  
 734 determining the uncertainties of water isotopes was not possible using this method at  
 735 Dome A, due to the non-continuous clear-sky and cloudy days in the studied period.  
 736 Therefore, the uncertainties of water isotopes at Dome A simulated cases were  
 737 estimated by using the variations of the uncertainties of latent heat ( $Q_{LE}$ ) and  
 738 fractionation coefficient ( $Q_{\alpha}$ ). This was done through the error propagation method for  
 739 a multi-variable function, as described by Radic et al. (2017). The detailed equations  
 740 used were as follows:

$$741 \quad Q_{\delta} = \sqrt{Q_{\alpha}^2 + Q_{LE}^2} \quad (S6)$$

742 where  $Q_{LE}$  can be determined by the above mentioned method,  $Q_{\alpha}$  is calculated from  
 743 the standard deviation of surface temperature based on the error propagation method.”

744

745 **Supplementary response**

746 **The revised figures in the main text are as follows:**

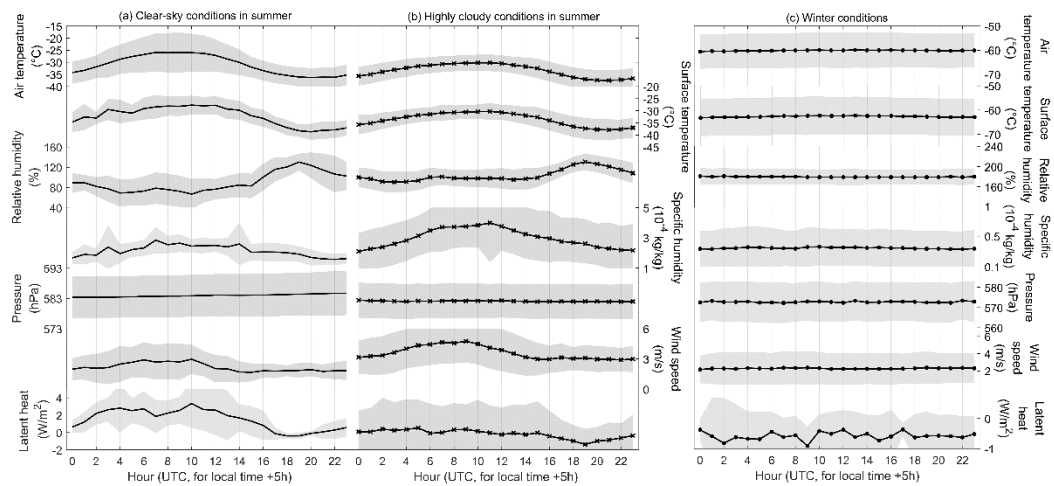

747

748 **Figure 2:** Stacks of diurnal cycles of meteorological parameters and the calculated  
 749 latent heat under summer clear-sky conditions (a), summer highly cloudy conditions  
 750 (b), and winter conditions (c) at Dome A. The hourly data for air temperature, relative  
 751 humidity, air pressure and wind speed were averaged by AWS observations over those  
 752 selected days. The diurnal variations for other three parameters were calculated based  
 753 on hourly observations. In each panel, the solid line with marks represents the average  
 754 and the grey shadow is the standard deviation. The background color of pink and blue  
 755 corresponds to the period dominated by sublimation and deposition, respectively, in a  
 756 diurnal cycle.

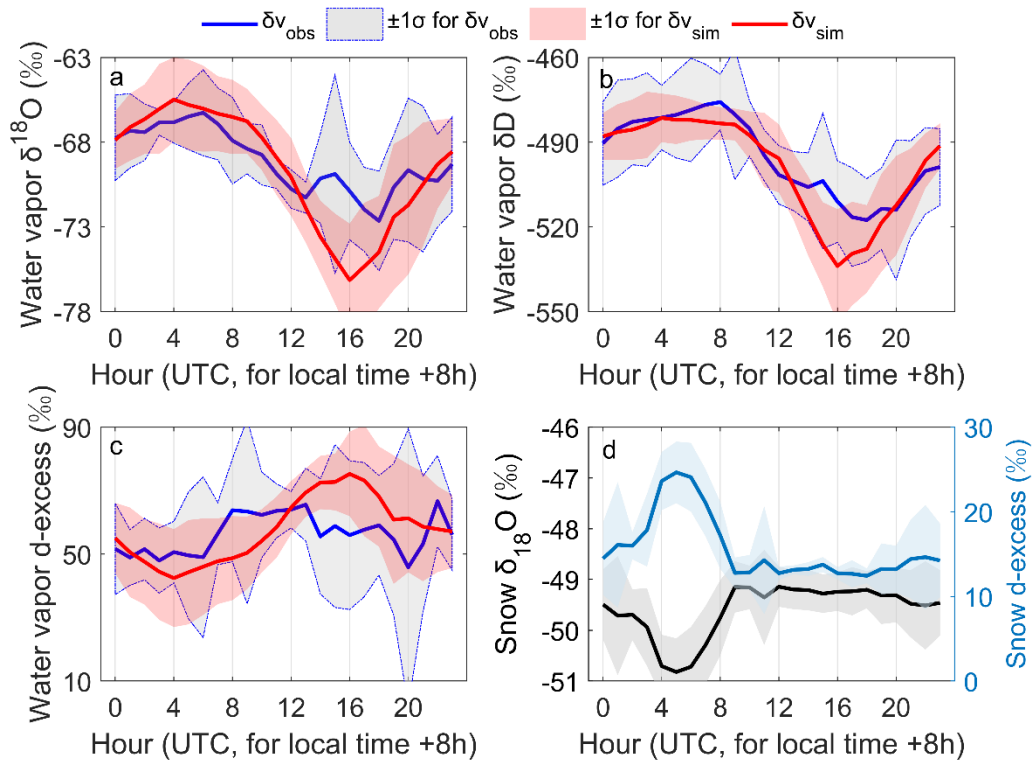

758

759

760

761

762

763

764

765

766

767

768

769

**Figure 3:** Model simulated diurnal variations of water vapor and snow isotopic compositions at Dome C along with the observations. (a) water vapor  $\delta^{18}\text{O}$ , (b) water vapor  $\delta\text{D}$ , (c) water vapor d-excess and (d) snow isotopes. In panels (a)-(c), blue solid line represents the observations of water vapor isotopic composition ( $\delta v_{\text{obs}}$ ) with the light grey shaded area as the uncertainties ( $\pm 1\sigma$  standard deviation). The red solid line and the light red shaded area depicts the modeled variations of water isotopic composition ( $\delta v_{\text{sim}}$ ) and correspondingly uncertainties ( $\pm 1\sigma$ ). In panel (d), the diurnal variations of modeled snow  $\delta^{18}\text{O}$  and d-excess are shown as the black solid line and light blue solid line, respectively. Their uncertainties are also displayed with shaded areas like  $\delta v_{\text{obs}}$  and  $\delta v_{\text{sim}}$  in first three panels. The method for uncertainties estimation can be seen in SI (Texts S2).

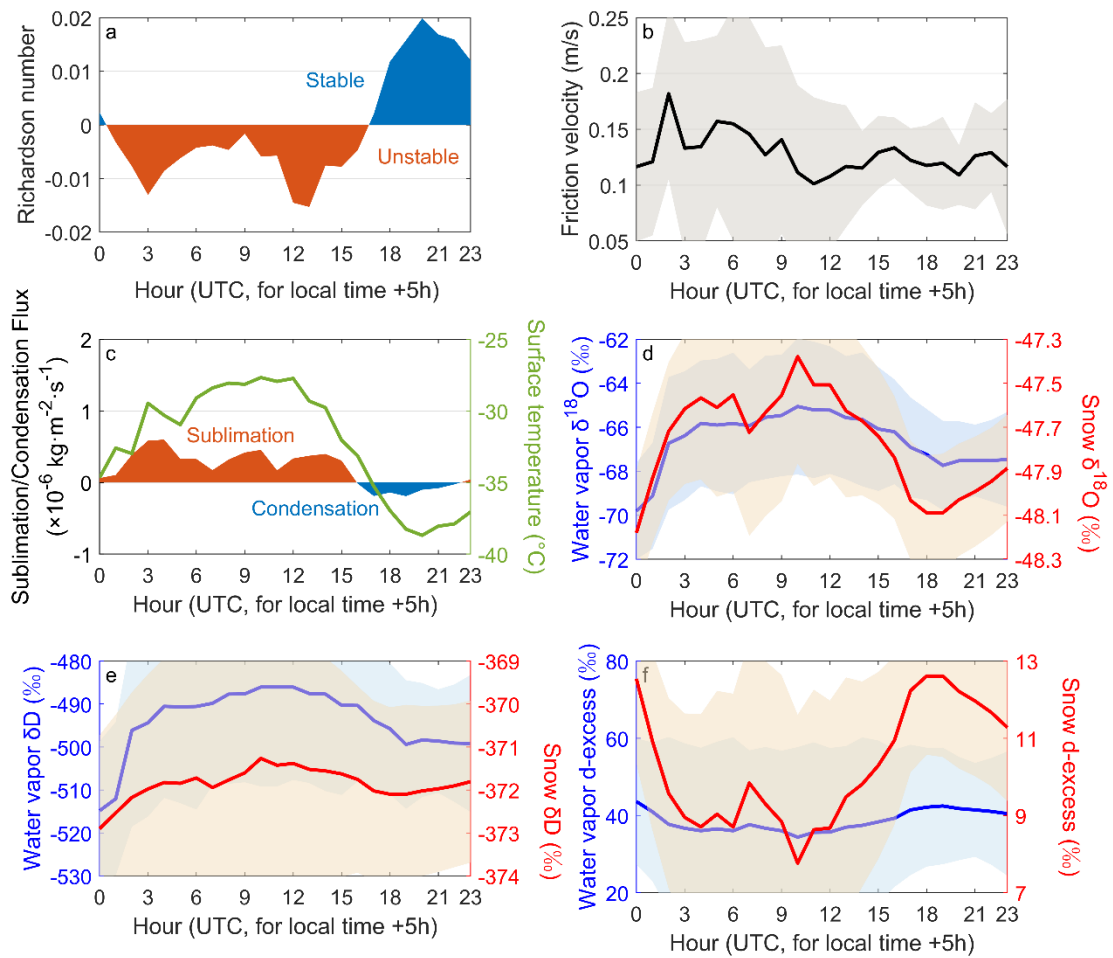

770

771

772 **Figure 4:** The simulated hourly mean vapor exchange flux and variations in

773 atmospheric water vapor and snow isotopes under summer clear-sky conditions at

774 Dome A: (a) Richardson number, (b) friction velocity, (c) vapor exchange flux, (d) snow

775 and water vapor  $\delta^{18}\text{O}$ , (e) snow and water vapor  $\delta\text{D}$ , (f) snow and water vapor d-excess.

776 The uncertainties for each variable are displayed by shaded area in each subpanel.

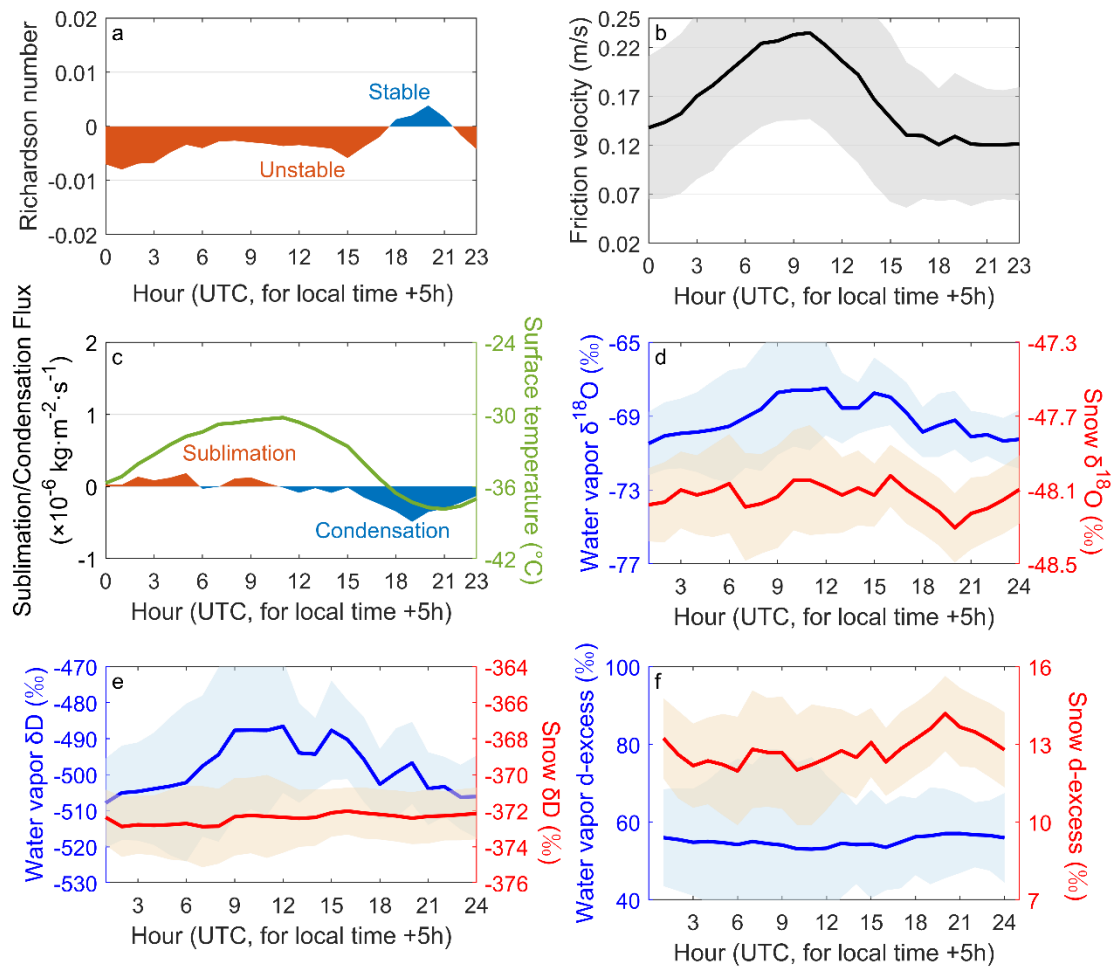

777  
778

**Figure 5:** Same to Figure 4 but for Dome A under highly cloudy conditions in summer.

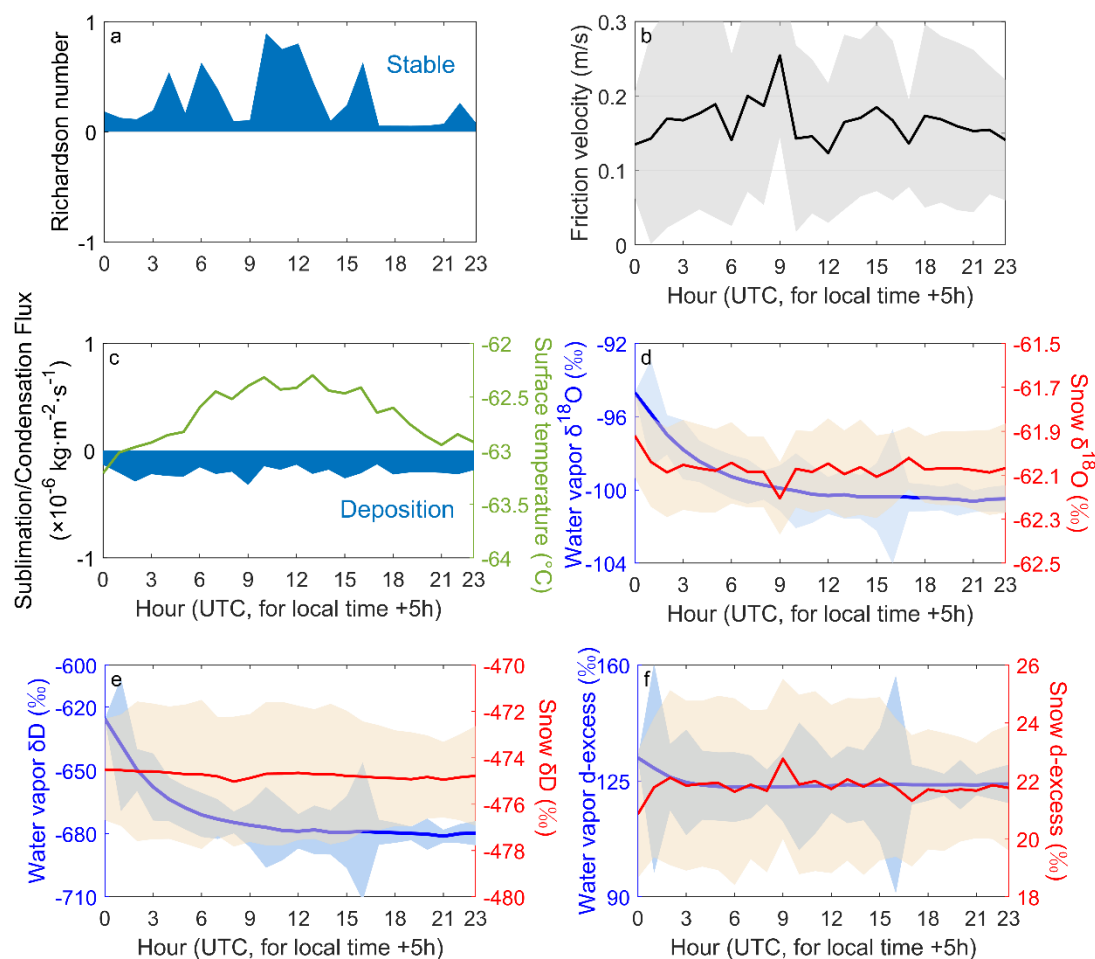

779

780 **Figure 6:** Same to Figure 4 but for Dome A under winter conditions.

781

782

783 **End of the responses to Reviewer #2**

784

785

786 **Reference**

787 Brun, E., Six, D., Picard, G., Vionnet, V., Arnaud, L., Bazile, E., et al.:  
 788 Snow/atmosphere coupled simulation at Dome C, Antarctica, *Journal of*  
 789 *Glaciology*, 57(204), 721-736, doi: 10.3189/002214311797409794, 2011.

790 Casado, M., Landais, A., Picard, G., Münch, T., Laepple, T., Stenni, B., et al.: Archival  
 791 processes of the water stable isotope signal in East Antarctic ice cores, *The*  
 792 *Cryosphere*, 12(5), 1745-1766, doi: 10.5194/tc-12-1745-2018, 2018.

793 Hughes, A. G., Wahl, S., Jones, T. R., Zuhr, A., Hörhold, M., White, J. W. C., et al: The  
 794 role of sublimation as a driver of climate signals in the water isotope content of  
 795 surface snow Laboratory and field experimental results, *The Cryosphere*, 15(10),  
 796 4949-4974, doi: 10.5194/tc-15-4949-2021, 2021.

797 King, J. C., & Anderson, P. S.: Heat and water vapour fluxes and scalar roughness

798 lengths over an Antarctic ice shelf, *Boundary-Layer Meteorology*, 69, 101–121,  
799 doi: org/10.1007/BF00713297, 1994.

800 Ma, B., Shang, Z., Hu, Y., Hu, K., Wang, Y., Yang, X., et al.: Night-time measurements  
801 of astronomical seeing at Dome A in Antarctica, *Nature*, 583(7818), 771–774, doi:  
802 10.1038/s41586-020-2489-0, 2020.

803 Ma, T., Li, L., Li, Y., An, C., Yu, J., Ma, H., et al.: Stable isotopic composition in  
804 snowpack along the traverse from a coastal location to Dome A (East Antarctica):  
805 Results from observations and numerical modelling, *Polar Science*, 24, 100510,  
806 doi: 10.1016/j.polar.2020.100510, 2020.

807 Ma Y.: Evaluation of Polar WRF Simulations of Atmospheric Circulation. 2012.  
808 Chinese Academy of Meteorological Sciences, PhD dissertation, 2012.

809 Merlivat, L., & Jouzel, J.: Global climatic interpretation of the deuterium-oxygen 18  
810 relationship for precipitation, *Journal of Geophysical Research: Oceans*, 84(C8),  
811 5029, doi: 10.1029/JC084iC08p05029, 1979.

812 Pang, H., Hou, S., Landais, A., Masson-Delmotte, V., Jouzel, J., Steen-Larsen, H. C., et  
813 al.: Influence of Summer Sublimation on  $\delta D$ ,  $\delta^{18}O$ , and  $\delta^{17}O$  in Precipitation,  
814 East Antarctica, and Implications for Climate Reconstruction from Ice Cores,  
815 *Journal of Geophysical Research: Atmospheres*, 124(13), 7339-7358, doi:  
816 10.1029/2018JD030218, 2019.

817 Ritter, F., Steen-Larsen, H. C., Werner, M., Masson-Delmotte, V., Orsi, A., Behrens, M.,  
818 et al.: Isotopic exchange on the diurnal scale between near-surface snow and lower  
819 atmospheric water vapor at Kohnen station, East Antarctica, *The Cryosphere*,  
820 10(4), 1647-1663, doi: 10.5194/tc-10-1647-2016, 2016.

821 Touzeau, A., Landais, A., Stenni, B., Uemura, R., Fukui, K., Fujita, S., et al.:  
822 Acquisition of isotopic composition for surface snow in East Antarctica and the  
823 links to climatic parameters, *The Cryosphere*, 10(2), 837-852, doi:10.5194/tc-10-  
824 837-2016, 2016.

825 van den Broeke, M., van As, D., Reijmer, C. & van de Wal, R.: Sensible heat exchange  
826 at the Antarctic snow surface: a study with automatic weather stations.  
827 *International Journal of Climatology*, 25, 1081-11010-, doi:10.1002/joc.1152,  
828 2005.

829 Vignon, E., Genthon, C., Barral, H., Amory, C., Picard, G., Gallée, H. et al.:  
830 Momentum- and Heat-Flux Parametrization at Dome C, Antarctica: A Sensitivity  
831 Study. *Boundary-Layer Meteorology*, 162, 341–367, doi: 10.1007/s10546-016-  
832 0192-3, 2017.

833 Wahl, S., Steen-Larsen, H. C., Reuder, J., & Hörhold, M.: Quantifying the Stable Water  
834 Isotopologue Exchange Between the Snow Surface and Lower Atmosphere by  
835 Direct Flux Measurements, *Journal of Geophysical Research: Atmospheres*,  
836 126(13), doi: 10.1029/2020jd034400, 2021.

837 Werner, M., Langebroek, P. M., Carlsen, T., Herold, M., & Lohmann, G.: Stable water  
838 isotopes in the ECHAM5 general circulation model: Toward high-resolution  
839 isotope modeling on a global scale, *Journal of Geophysical Research: Atmosphere*,  
840 116, 14, doi: 10.1029/2011jd015681, 2011.

841



842  
843
